# Supplementary material for: Toward continental hydrologic–hydrodynamic modeling in South America
Source: Copernicus journal article supplement (doi:10.5194/hess-22-4815-2018), 2018-09-18
Supplement: Supplementary file 1 [file hess-22-4815-2018-supplement.pdf]

Supplement of Hydrol. Earth Syst. Sci., 22, 4815–4842, 2018  
<https://doi.org/10.5194/hess-22-4815-2018-supplement>  
© Author(s) 2018. This work is distributed under  
the Creative Commons Attribution 4.0 License.

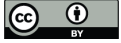

*Supplement of*

## **Toward continental hydrologic–hydrodynamic modeling in South America**

**Vinícius A. Siqueira et al.**

*Correspondence to:* Vinícius A. Siqueira (vinisiquera@gmail.com)

The copyright of individual parts of the supplement might differ from the CC BY 4.0 License.

## Supplementary Material

### S1. Details about the MGB hydrological–hydrodynamic model

In this section, a brief overview of the MGB structure used for hydrological modeling in South America is presented. Basically, this is a vector-based model that uses conceptual equations to simulate the terrestrial hydrological cycle, including soil water and energy budget, evapotranspiration, canopy interception, surface, subsurface and groundwater runoff, as well as flow routing along river channels (**Figure S1.1**). The following sections are described according to the initial model development by Collischonn et al., (2007) and further improvements by Paiva et al., (2011), Pontes et al., (2017) and Fleischmann et al., (2018).

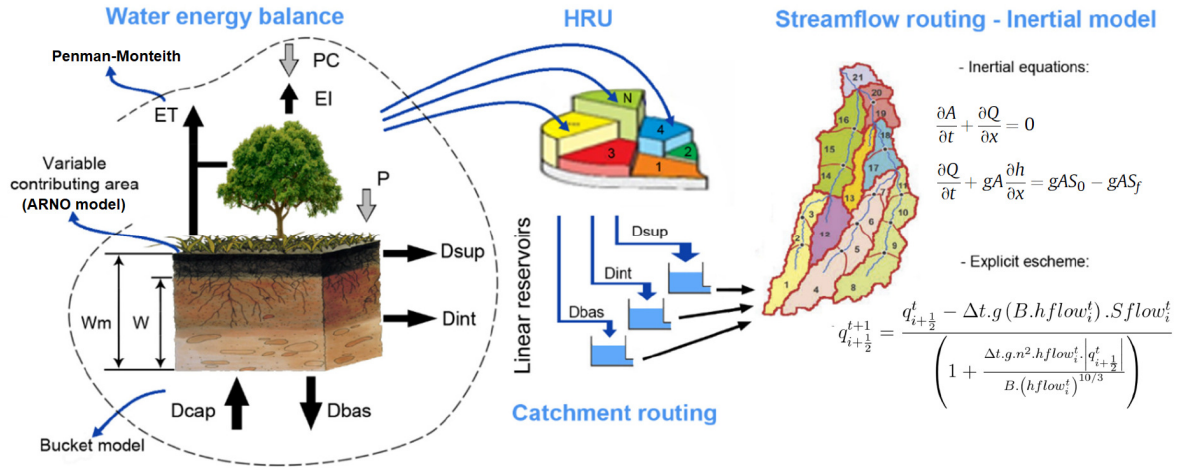

Figure S1.1. Schematic representation of MGB model general structure.

#### S1.1 Water and energy balance

In the model, the basin is discretized into unit-catchments, which are further divided in hydrological response units (HRU) (Beven, 2001) that are usually produced by the combination of soil and land cover maps. Vertical water and energy budgets are computed independently for each HRU of each unit-catchment. Soil water balance is computed considering a single soil layer (bucket model), according to:

$$W_{i,j}^t = W_{i,j}^{t-1} + (P_i - ET_{i,j} - Dsup_{i,j} - Dint_{i,j} - Dbas_{i,j} + Dinf_{i,j}) \Delta t \quad \text{Eq. S1.1.1}$$

Where:  $t$ ,  $i$  and  $j$ , are indexes related to time step, unit-catchment and HRU, respectively;  $Wm$  is the water storage capacity in the soil layer [mm];  $P$  is the precipitation that reaches the soil [mm  $\Delta t^{-1}$ ];  $ET$  is the evapotranspiration from soil [mm  $\Delta t^{-1}$ ];  $Dsup$  is the surface runoff [mm  $\Delta t^{-1}$ ];  $Dint$  is the subsurface flow [mm  $\Delta t^{-1}$ ];  $Dbas$  is the flow to the groundwater reservoir [mm  $\Delta t^{-1}$ ];  $Dinf$  is the infiltration of flooded areas to the soil [mm  $\Delta t^{-1}$ ] and;  $\Delta t$  is the time step for water budget, usually equal to 1 day.

Soil infiltration and runoff are computed based on the variable contributing area concept of the ARNO model (Todini, 1996):

$$Dsup_{i,j} = \Delta t P_i - (Wm_j - W_{i,j}^{t-1}), \text{ for } y \leq 0 \quad \text{Eq. S1.1.2}$$

$$Dsup_{i,j} = \Delta t P_i - (Wm_j - W_{i,j}^{t-1}) + Wm_j \left[ \left( 1 - \frac{W_{i,j}^{t-1}}{Wm_j} \right)^{\frac{1}{b_j+1}} - \frac{\Delta t P_i}{Wm_j (b_j + 1)} \right]^{b_j+1}, \text{ for } y > 0 \quad \text{Eq. S1.1.3}$$

$$y = \left[ \left( 1 - \frac{W_{i,j}^{t-1}}{Wm_j} \right)^{\frac{1}{b_j+1}} - \frac{\Delta t P_i}{Wm_j (b_j + 1)} \right] \quad \text{Eq. S1.1.4}$$

Where  $W$  is the current soil water storage [mm];  $Wm$  is the maximum water storage capacity [mm];  $b$  is a parameter that controls the distribution of water storage capacity of the soil [-];  $P$  is the precipitation that reaches the soil [mm];

Subsurface flow is obtained using a function similar to the Brooks and Corey unsaturated hydraulic conductivity equation (Rawls et al., 1993):

$$Dint_{i,j} = Kint_j \left( \frac{W_{i,j} - Wz_j}{Wm_j - Wz_j} \right)^{\left( 3 + \frac{2}{\lambda_j} \right)} \quad \text{Eq. S1.1.5}$$

Where  $Kint$  is the saturated hydraulic conductivity [mm  $\Delta t^{-1}$ ],  $\lambda$  is the soil porosity index [-] and  $Wz$  is the lower limit below which there is no subsurface flow ( $Wz = 0.1Wm$ ).

Percolation from soil layer to groundwater is calculated according to a simple linear relation between soil water storage and maximum soil water storage:

$$Dbas_{i,j} = Kbas_j \left( \frac{W_{i,j} - Wc_j}{Wm_j - Wc_j} \right) \quad \text{Eq. S1.1.6}$$

Where  $Kbas$  is a parameter that gives the percolation rate to groundwater in the case of saturated soil [ $\text{mm } \Delta t^{-1}$ ].

Infiltration from floodplain into soil column is computed as a two-way coupled scheme between hydrological vertical balance and hydrodynamic module (see next section, **Eq. S1.2.9**). It is assumed that infiltration rate is linearly dependent on the degree of soil saturation, thus reaching its maximum when soil is completely dry (Fleischmann et al., 2018).

$$D_{inf_i}^t = \frac{A_{fl_i}^t}{A_i} \cdot K_{inf} \left( 1 - \frac{W_i^t}{Wm} \right) \quad \text{Eq. S1.1.7}$$

Where  $A_{fl_i}$  is the flooded area at unit-catchment  $i$  [ $\text{km}^2$ ],  $A$  is the unit-catchment area [ $\text{km}^2$ ],  $K_{inf}$  the infiltration rate that occurs when the whole unit-catchment is flooded and soil is totally dry [ $\text{mm } \Delta t^{-1}$ ],  $w$  is the soil water content and  $Wm$  is the maximum soil water storage.

Runoff generated ( $Dsup$ ,  $Dint$  and  $Dbas$ ) within unit-catchments is routed to the drainage network using three independent linear reservoirs (**Eqs. S1.1.8–S1.1.10**). For surface and subsurface reservoirs, streamflow releases ( $Q$ ) are controlled by the time of concentration computed with Kirpich formula similarly to Ludwig and Bremicker (2006).

$$Q_{sup_i} = \frac{V_{sup_i}}{Cs \left[ 3600 \left( 0.868 \frac{L_i}{\Delta H_i} \right)^{0.385} \right]} \quad \text{Eq. S1.1.8}$$

$$Q_{int_i} = \frac{V_{int_i}}{Ci \left[ 3600 \left( 0.868 \frac{L_i}{\Delta H_i} \right)^{0.385} \right]} \quad \text{Eq. S1.1.9}$$

$$Q_{bas_i} = \frac{V_{bas_i}}{Cb} \quad \text{Eq. S1.1.10}$$

Where  $Vsup$ ,  $Vint$  and  $Vbas$  are the surface, subsurface and groundwater reservoir volumes, respectively [ $\text{m}^3$ ];  $L_i$  and  $\Delta H_i$  are, respectively, the length and the elevation difference of the largest flowpath between unit-catchment border and the main river [ $\text{m}$ ];  $Cs$

and  $C_i$  are parameters that correct the prior estimate of time of concentration (given by Kirpich formula) [-];  $C_b$  is the groundwater residence time, which can be estimated from hydrograph recession considering a long dry period [s].

Precipitation is assumed to be stored in canopy until maximum interception storage capacity is reached, which is determined for each HRU based on the vegetation leaf area index. Energy budget and evaporation from soil, vegetation and canopy to the atmosphere is estimated by the Penman–Monteith equation (Shuttleworth, 1993), using an approach similar to Wigmosta et al., (1994):

$$E = \left[ \frac{\Delta (R_L - G) + \rho_a c_p \frac{e_s - e_d}{r_a}}{\Delta + \gamma \left(1 + \frac{r_s}{r_a}\right)} \right] \frac{1}{\lambda \rho_w} \quad \text{Eq. S1.1.11}$$

Where  $E$  is the potential evaporation rate [ $\text{m s}^{-1}$ ];  $R_L$  is the net radiation [ $\text{MJ m}^{-2} \text{s}^{-1}$ ];  $G$  is the soil heat flux [ $\text{MJ m}^{-2} \text{s}^{-1}$ ];  $\lambda$  is the latent heat of vaporization [ $\text{MJ kg}^{-1}$ ];  $\Delta$  is the gradient of the saturated vapour pressure–temperature function [ $\text{kPa } ^\circ\text{C}^{-1}$ ];  $A$  is the available energy [ $\text{MJ m}^{-2} \text{s}^{-1}$ ];  $\rho_a$  is the air density [ $\text{kg m}^{-3}$ ];  $\rho_w$  is the specific mass of water [ $\text{kg m}^{-3}$ ];  $c_p$  is the specific heat of moist air [ $\text{MJ kg}^{-1} \text{ } ^\circ\text{C}^{-1}$ ];  $(e_s - e_d)$  represents the vapor pressure deficit [ $\text{kPa}$ ];  $\gamma$  is the psychrometric constant [ $\text{kPa } ^\circ\text{C}^{-1}$ ];  $r_s$  is the surface resistance of the land cover [ $\text{s m}^{-1}$ ] and  $r_a$  is the aerodynamic resistance [ $\text{s m}^{-1}$ ].

Firstly, intercepted water is evaporated ( $EI$ ) at the potential rate  $E$ . The evapotranspiration ( $ET$ ) of the vegetated soil (soil evaporation + plant transpiration) is calculated using **Eq. S1.1.11**, weighted by the remaining evaporative demand ( $[E - EI]/E$ ) in order to respect the overall energy balance. In addition,  $ET$  is reduced in situations of water stress, and it is assumed that soil conditions restrict evapotranspiration if current soil water storage is below a threshold value given by  $W_L = W_m / 2$ . In the range between this limit and the wilting point, surface resistance increases according to:

$$r_s = r_{s_j,m} \left( \frac{W_L - W_{wp}}{W_{i,j} - W_{wp}} \right) \quad \text{Eq. S1.1.12}$$

Where  $W_{wp}$  is the wilting point, equal to 10% of maximum soil capacity ( $Wm$ ) [mm];  $r_{s_{j,m}}$  is the vegetation-dependent minimum surface resistance, in conditions not affected by soil moisture [ $s\ m^{-1}$ ] and  $m$  is the month index.

### S1.2 Flow routing (local inertial equation)

Flow in natural channels is governed by 1D full Saint–Venant equations (Cunge et al., 1980), expressed by continuity (**Eq. S1.2.1**) and momentum conservation (**Eq. S1.2.2**):

$$\frac{\partial A}{\partial t} + \frac{\partial Q}{\partial x} = q, \tag{Eq. S1.2.1}$$

$$\underbrace{\frac{\partial Q}{\partial t}}_{\text{Local Acceleration}} + \underbrace{\frac{\partial}{\partial x} \left( \frac{Q^2}{A} \right)}_{\text{Convective Acceleration}} + \underbrace{gA \frac{\partial (h+z)}{\partial x}}_{\text{Pressure + Bed gradients}} + \underbrace{\frac{gn^2 |Q| Q}{R_h^{4/3} A}}_{\text{Friction}} = 0 \tag{Eq. S1.2.2}$$

Where  $Q$  is the river discharge [ $m^3\ s^{-1}$ ],  $q$  is the lateral inflow [ $m^3\ s^{-1}$ ],  $A$  is the flow cross-section area [ $m^2$ ],  $h$  is the flow depth [m],  $z$  is the channel bed elevation, relative to a datum [m];  $R_h$  is the hydraulic radius [m],  $g$  is the acceleration due to gravity [ $m\ s^{-2}$ ], and  $n$  is the Manning coefficient [ $s\ m^{-1/3}$ ].

In order to deal with a wide range of flow conditions, the MGB solves the momentum equation using the local inertial approximation proposed by Bates et al., (2010). Using a forward in time finite difference scheme and neglecting the convective acceleration term, the momentum equation can be written as:

$$\frac{Q^{t+1} - Q^t}{\Delta t} + gA \frac{\partial (h^t + z)}{\partial x} + \frac{gn^2 |Q^t| Q^t}{R_h^{4/3} A} = 0 \tag{Eq. S1.2.3}$$

In **Eq. S1.2.3**, flow variables in the friction term ( $|Q^t|Q^t$ ) are written semi-implicitly ( $|Q^t|Q^{t+1}$ ), which in turn can be rearranged into an explicit form of flow calculation:

$$Q^{t+1} = \frac{Q^t - \Delta t g A \frac{\partial (h^t + z)}{\partial x}}{\left( 1 + \frac{\Delta t g n^2 |Q^t|}{R_h^{4/3} A} \right)} \tag{Eq. S1.2.4}$$

Assuming a rectangular channel and approximating the hydraulic radius with the flow depth ( $h$ ) for wide, relatively shallow rivers, we can divide **Eq. S1.2.4** by the flow constant width ( $B$ ) to obtain an equation in terms of flow per unit width:

$$q^{t+1} = \frac{q^t - \Delta t g h^t \frac{\partial(h^t+z)}{\partial x}}{\left(1 + \frac{\Delta t g h^t n^2 |q^t|}{(h^t)^{10/3}}\right)} \quad \text{Eq. S1.2.5}$$

The resulting local inertial equation (Bates et al., 2010) plays an important role for large-scale simulations in lowland rivers and floodplains areas, and some advantages over a diffusive wave model (which neglects both acceleration terms) include a better physical representation of shallow water flows, as well as the stability improvement for both large depths and small surface water slopes (Yamazaki et al., 2013; de Almeida et al., 2013). Following Almeida et al., (2012) and Neal et al., (2012), the explicit finite difference scheme is applied to a “staggered grid”, so that flows at interfaces are used to update water depths at the centers of the numerical grid (i.e., centered in space approximation). Therefore, the momentum equation is written at its final form:

$$q_{i+1/2}^{t+1} = \frac{q_{i+1/2}^t - \Delta t . g (B . hflow_i^t) . Sflow_i^t}{\left(1 + \frac{\Delta t . g . n^2 . hflow_i^t . |q_{i+1/2}^t|}{B . (hflow_i^t)^{10/3}}\right)} \quad \text{Eq. S1.2.6}$$

Where:  $\Delta t$  is the routing model time step [s];  $q_{i+1/2}^t$  and  $q_{i+1/2}^{t+1}$  are, respectively, the flow from previous and current time step divided by channel width, at the outlet of unit catchment  $i$  [ $\text{m}^2 \text{s}^{-1}$ ];  $Sflow_i$  and  $hflow_i$  are, respectively, the water surface slope [ $\text{m m}^{-1}$ ] and the effective water depth at the interface between current ( $i$ ) and downstream ( $i+1$ ) unit-catchment [m].

Note that indexes  $i+1/2$  are positions of the numerical grid corresponding to the outlets of unit-catchments, which are defined at grid interfaces. Using a similar approach of Neal et al., (2012),  $Sflow$  and  $hflow$  are computed as:

$$Sflow_i^t = \frac{(h_{i+1}^t + z_{i+1}) - (h_i^t + z_i)}{\Delta x_i} \quad \text{Eq. S1.2.7}$$

$$hflow_i^t = \max [h_{i+1}^t + z_{i+1}; h_i^t + z_i] - \max [z_{i+1}; z_i] \quad \text{Eq. S1.2.8}$$

Where  $\Delta x_i$  is the flow distance, computed as the average between channel lengths  $L_i$  and  $L_{i+1}$  ( $\Delta x_i \approx L_i \approx L_{i+1}$ , according to the fixed-length river discretization, see **sect. S1.3**);  $h_i$  and  $h_{i+1}$  are the flow depths;  $z_i$  and  $z_{i+1}$  are the channel bed elevations, respectively, at unit-catchments  $i$  and  $i+1$ .

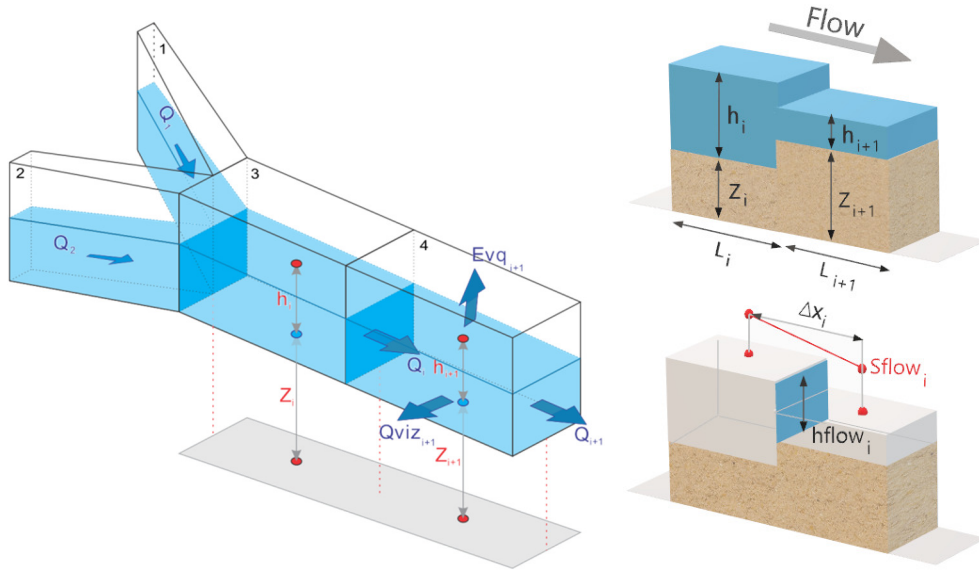

**Figure S1.2.1. Schematic representation of MGB flow calculation units.**

Discharge is computed after solving **Eq. S1.2.6** and multiplying the  $q$  variable by channel width ( $B$ ), which means that the effective flow area is limited by the rectangular channel geometry. Similar to Yamazaki et al., (2011) and Luo et al., (2017), water mass is instantaneously exchanged between channel and floodplain when bankfull depth is exceeded, whereas water surface elevation of both storages is assumed equal within a given unit-catchment. Total volume (channel + floodplain) is updated using the continuity equation, expressed in terms of:

$$V_i^{t+1} - V_i^t = \left[ \sum Q_{in}^t - \sum Q_{out}^t - \left( Evq_i^t - D_{in,fi}^t \right) A_{fl_i}^t / 1000 \right] \Delta t \quad \text{Eq. S1.2.9}$$



Where  $V_i$  is the total volume stored in channel and floodplains, for unit-catchment  $i$  [ $\text{m}^3$ ];  $Q_{in}$  and  $Q_{out}$  are, respectively, the inflow and outflow discharge of unit-catchment  $i$  [ $\text{m}^3 \text{s}^{-1}$ ];  $Evq_i$  is the evaporation loss [ $\text{mm } \Delta t^{-1}$ ] and;  $Dinf_i$  is the infiltration from floodplains to soil column [ $\text{mm } \Delta t^{-1}$ ]. Note in **Figure S1.2.1** that MGB can also route water in multiple directions downstream ( $Q_{viz}$ ) (Pontes et al., 2017), but this configuration is not used in the current South America version.

Evaporation losses are considered by assuming flooded area as open water (i.e.,  $r_s = 0$ ) and applying the Penman–Monteith equation (**Eq. S1.1.11**). Therefore, when flooding occurs in a given unit-catchment, the surface area available for soil water budget is reduced proportionally from each HRU, while rainfall over flooded area produces direct surface runoff.

After solving all  $V^{t+1}$  in **Eq. S1.2.9**, these values are used to obtain flow depths by interpolating the water volume at each unit-catchment using channel/floodplain profiles (see section **S1.6** for details). Updated flow depths are then used to recompute both  $S_{flow}$  and  $h_{flow}$  variables using **Eqs. S1.2.7** and **S1.2.8**, so that flows can be obtained for next time step.

An advantage of the explicit inertial formulation is that model time step is governed by the Courant–Friedrichs–Lewy (CFL) condition. Therefore, the maximum acceptable time step is adaptive and changes according to maximum water depth (**Eq. S1.2.10**):

$$\Delta t = \alpha \frac{\Delta x}{\sqrt{gh_{max}}} \tag{Eq. S1.2.10}$$

Where  $\Delta x$  is the flow distance (according to fixed-length discretization);  $h_{max}$  is the maximum flow depth in model domain and  $\alpha$  is a coefficient that varies between 0.2–0.7 (Bates et al., 2010).

Despite the CFL condition provides the optimum time step needed for flow computation, some issues can arise especially in rivers with higher slopes, which are expected to produce model instabilities. In cases where supercritical flows occur, a flow limiter (**Eq. S1.2.12**) is then invoked to force the Froude number (**Eq. S1.2.11**) below to unity, so that model stability can be further enhanced:

$$F = \frac{v}{\sqrt{gh}} = \frac{Q/A}{\sqrt{gh}} < 1 \quad \text{Eq. S1.2.11}$$

$$Q \begin{cases} \min \left[ Q; B\sqrt{hflow^{1.5}g} \right] & \text{for } Q \geq 0 \\ \max \left[ Q; -B\sqrt{hflow^{1.5}g} \right] & \text{for } Q < 0 \end{cases} \quad \text{Eq. S1.2.12}$$

Where  $F$  is the Froude number [-];  $v$  is the mean flow velocity [ $\text{m s}^{-1}$ ];  $B$  is the channel width [m]. Note that the flow limiter also considers reverse flows, which can occur due to backwater effects.

### **S1.3 Spatial representation of river network in MGB model: definition of unit-catchments by a fixed-length river discretization**

As unit-catchments derived from topography (sub-basin approach) are defined between river junctions (Maidment, 2002), the resulting river reaches are characterized by a high variability of lengths that are not suitable for hydrodynamic routing. Therefore, we adopted a fixed-length vector river discretization in order to provide even (and predefined) flow distances between unit-catchments, as well as to facilitate coupling of both hydrological and hydrodynamic modules of MGB. This approach was first mentioned in Pontes et al., (2017) and has been included in the IPH-Hydro Tools GIS package (Siqueira et al., 2016b). Using grids of flow direction, flow accumulation and river networks, the fixed length discretization can be conducted through the following sequence of steps:

#### **S1.3.1. Step 1 – Marking outlets**

The first step is to identify all the intermediate outlet points in the stream network. An "intermediate outlet" refers to the very downstream pixel of a given river reach (i.e., between two junctions), as can be seen in the orange boxes presented in **Figure S1.3.1a**. For each pixel in the flow direction grid, if two or more neighboring pixels are drained to the analyzed one, provided that all of them are over the extracted drainage, then a junction is found. Using a  $3 \times 3$  window centered at this point, the grid positions of nearby upstream draining pixels (i.e., intermediate outlets) are stored together with their respective flow accumulated areas. This procedure is repeated until the entire grid is evaluated, and by the end the positions and accumulated area of basin outlet are also stored in conjunction with the intermediate outlets.

### **S1.3.2. Step 2 – Delineating reaches and unit-catchments by a length threshold**

The second step is to segment streams using a specific length as a threshold value, thus providing an even distribution of flow distances. For this, grid positions of the intermediate outlets are initially sorted descending according to their flow accumulated area, so the outlet of the main stream is processed at first. Following the schematic presented in **Figure S1.3.1b**, the procedure then starts at the basin outlet point (green square) using a value of accumulated length equal to 0. Tracing in the upstream direction, the length is accumulated pixel by pixel using Euclidean local distances and the Distance Transforms method (Butt and Maragos, 1998; Paz and Collischonn, 2007), and an identifier value (ID) is assigned to each pixel along the flow path to further distinguish between reaches. Whenever the threshold value of distance is exceeded, as highlighted by the break lines in **Figure S1.3.1b**, the ID is increased by one unit and the accumulated length is reset to zero. This procedure must be constantly repeated, but when a junction is found along the current flowpath, the algorithm selects the upstream pixel with the highest accumulated area (blue squares) to keep tracing until the threshold value of length is met. However, if the length threshold is not achieved when the headwater pixel is found, an extension of the drainage network (dashed line in **Figures S1.3.1b, S1.3.1c and S1.3.1d**) is created following the pixel with the highest upstream accumulated area. In other words, it results in a "dynamic area threshold" for first order streams, but in this case, length can be lesser than the threshold value once it is topographically limited by headwater catchment boundaries.

After defining all branches in the basin main river, the next intermediate outlet with the highest value of accumulate area is selected (green square) to proceed with the segmentation process, as shown in **Figure S1.3.1c**. However, it is important to mark outlet pixels over the previously segmented flow path as "checked" (white squares). Because the algorithm starts from an intermediate outlet (accumulated length = 0) when tracing in upstream direction, checked pixels must be neglected to avoid redefinition of already processed reaches. Following these constraints, the procedure continues until the entire river network is segmented (**Figure S1.3.2a**).

Finally, all pixels draining to a given reach (i.e., with the same ID) belong to the same unit-catchment, as presented in **Figure S1.3.2b**. The discretization procedure also creates an irregular grid according to topography, despite of the unit-catchment bending at tributaries due to the length threshold constraint.

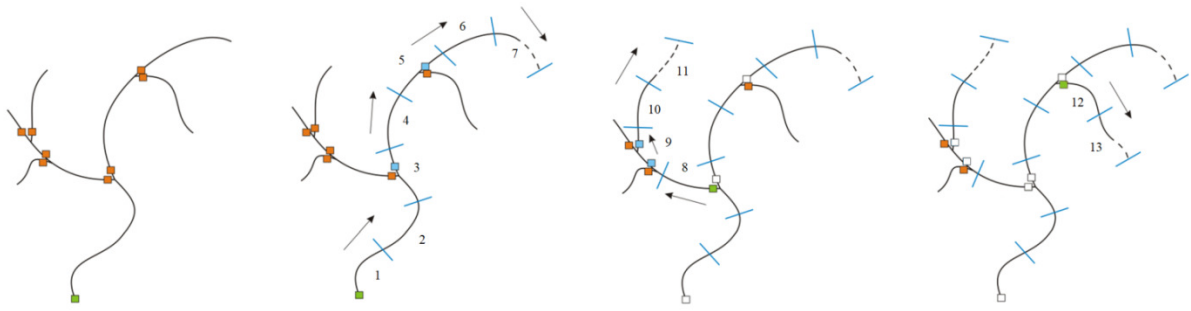

**Figure S1.3.1.** Procedure of delineating reaches by a length threshold value: (a) Marking intermediate (orange squares) and basin outlet (green square) points, (b) Segmentation starting from basin outlet (green square) and junction overpass following outlet pixels with highest accumulated area (blue squares), (c) Segmentation starting from the next intermediate outlet (green square), ranked in descending order of accumulated area. Intermediate outlet pixels located at previously traced flowpaths (white squares) are ignored if selected for starting a new segmentation.

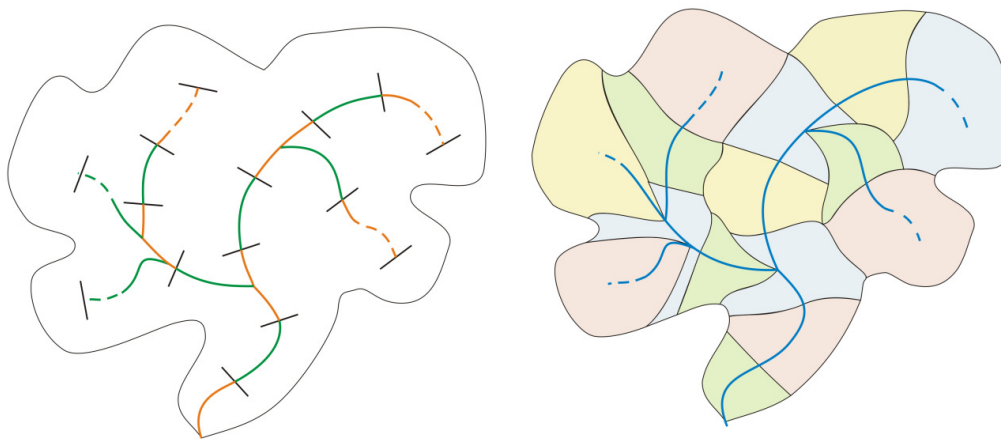

**Figure S1.3.2.** Schematic representation of the resulting fixed-length vector-based discretization: (a) Final river segmentation: river reaches are separated by break lines and distinguished by colors (orange and green) for visualization purposes; (b) All pixels draining to the same river reach correspond to a given unit-catchment.

**Figure S1.3.3** shows an example of the resulting unit-catchments for South America version of MGB, using the above fixed-length discretization approach. Unit-catchments were produced using the flow direction map of HydroSHEDS (Lehner et al., 2008), an upstream area threshold of 1000 km<sup>2</sup> for river networks and a length threshold of  $\Delta x = 15$  km. Each unit-catchment centroid represents the location for which precipitation fields are interpolated, as required for the rainfall-runoff module of MGB.

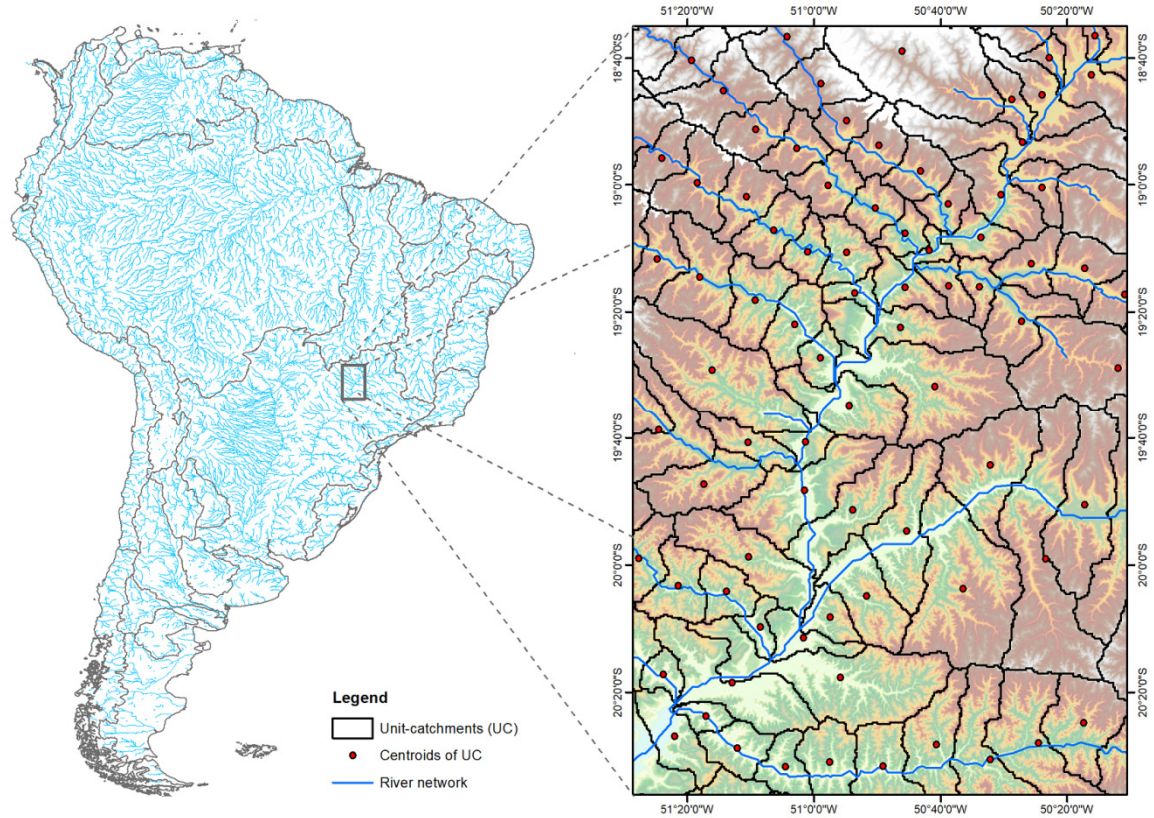

**Figure S1.3.3.** River drainage networks of South America derived from HydroSHEDS flow direction map (Lehner et al., 2008) (left); Unit-catchments defined with a fixed-length river discretization, using a threshold of  $\Delta x = 15$  km (right). Red points represent unit-catchment centroids where rainfall is interpolated.

#### S1.4 Channel geometry

For the assumption of a rectangular channel, river cross-section geometry is parameterized using downstream hydraulic geometry relationships (HG):

$$W_{bfi} = aA_i^b \quad \text{Eq. S1.4.1}$$

$$D_{bfi} = cA_i^d \quad \text{Eq. S1.4.2}$$

Where  $D_{bfi}$  is the bankfull depth [m] for unit-catchment  $i$ ;  $W_{bfi}$  is the channel width [m] for unit-catchment  $i$ ;  $A_i$  is the drainage area for unit-catchment  $i$  [ $\text{km}^2$ ];  $a$ ,  $b$ ,  $c$  and  $d$  are fitting parameters, respectively, for river depth and width according to drainage area.

**Table S1.4.1 and Figure S1.4.1** show an overview of channel geometries adopted for South America version of MGB, which were retrieved from literature. It is worth noting that Paiva et al., (2011, 2013) and Pontes (2016) are past applications of MGB model in Amazon

and La Plata basins, respectively.

**Table S1.4.1. Sources of river geometry parameters (bankfull width and depth) for South American rivers.**

| Basin/River                                       | Reference                    | River Geometry                                                                                                                                                | Local adjustments                                                                                                                                              |
|---------------------------------------------------|------------------------------|---------------------------------------------------------------------------------------------------------------------------------------------------------------|----------------------------------------------------------------------------------------------------------------------------------------------------------------|
| Amazon main stem ( $A_d > 2500000 \text{ km}^2$ ) | Beighley and Gummaldi (2011) | HG based on drainage area                                                                                                                                     | -                                                                                                                                                              |
| Japura, Negro, Solimoes, Xingu and Tapajos        | Paiva et al., (2013)         | HG based on drainage area                                                                                                                                     | -                                                                                                                                                              |
| Purus and Jurua                                   | Paiva et al., (2011)         | HG based on drainage area                                                                                                                                     | -                                                                                                                                                              |
| La Plata (Parana, Paraguay and Uruguay)           | Pontes (2016)                | *HG based on drainage area (Uruguay and Upper Parana basins)<br><br>*Widths of main rivers obtained from Satellite imagery (Paraguay and lower Parana basins) | Bermejo River ( $A_d > 55000 \text{ km}^2$ ):<br>$W = 270.82 \exp(-0.00005 A_d)$<br><br>Uruguay River ( $A_d > 50000 \text{ km}^2$ ):<br>$W = 0.01 A_d^{0.95}$ |
| Other South American Rivers                       | Andreadis et al., (2013)     | HG based on mean annual peak flow                                                                                                                             | Sao Francisco river ( $A_d > 120000 \text{ km}^2$ ): $D = 12\text{m}$                                                                                          |

$A_d$  = Drainage Area;  $W$  = Width;  $D$  = Depth;

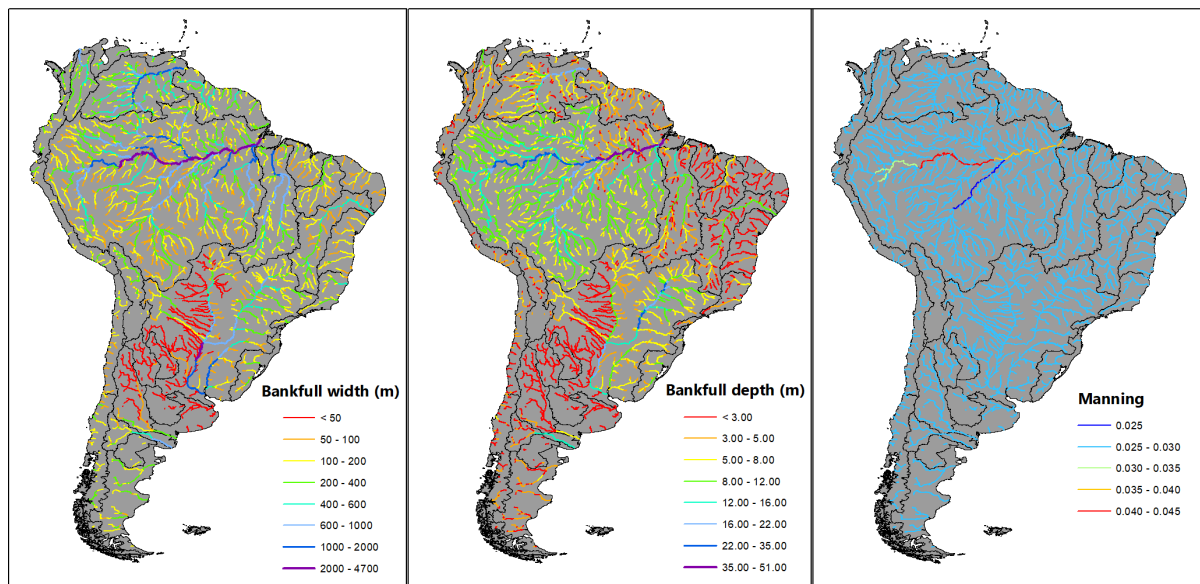

**Figure S1.4.1. Adopted bankfull width and depth values based on works by Beighley e Gummaldi (2011), Andreadis et al., (2013), Paiva et al., (2011, 2013) and Pontes (2016). Manning coefficient was globally set to 0.03, with further adjustments based on Paiva et al., (2013)**

### A1.5 Adjustment of river bed profiles

River bed elevations ( $z$  in Eq. S1.2.8) are estimated subtracting the channel depths

from the river bank heights derived from a spaceborne DEM (in this case, the Bare-Earth SRTM version 1 DEM, (O’Loughlin et al., 2016)). However, for large-scale hydrodynamic routing it is essential to reduce noise in river bed profiles to avoid the excess of water leaving channels to the floodplains, especially when coarse resolution (both spatial and vertical) DEMs are used (Paiva et al., 2011; Yamazaki et al., 2012; Chen et al., 2018). Also, noise in river bed profiles are likely to be even more pronounced because of the superposition of HydroSHEDS drainage networks over the Bare-Earth SRTM, since the latter is not hydrologically corrected (for instance, after using a depression-filling correction (e.g. Jenson and Domingue, 1988)).

To handle this, we applied a noise reduction method based on a simple linear regression to obtain smoothed river bank heights. For a given unit-catchment, all DEM pixels located over the river reach of  $\Delta x = 15$  km (according to fixed-length discretization) are used to adjust a linear regression. River bank height is set as the smoothed elevation associated to the center pixel of the river reach (**Figure S1.5.1**), without modifying DEM original values. Indeed, a larger benefit of the smoothing procedure is expected if a large number of pixels is sampled, i.e., by adopting a larger  $\Delta x$ , albeit this is not a good option due to the potential numerical instabilities associated to flow routing. **Figure S1.5.2** shows an example of the smoothed bed profile in comparison to the original one extracted from Bare-Earth SRTM (O’Loughlin et al., 2016).

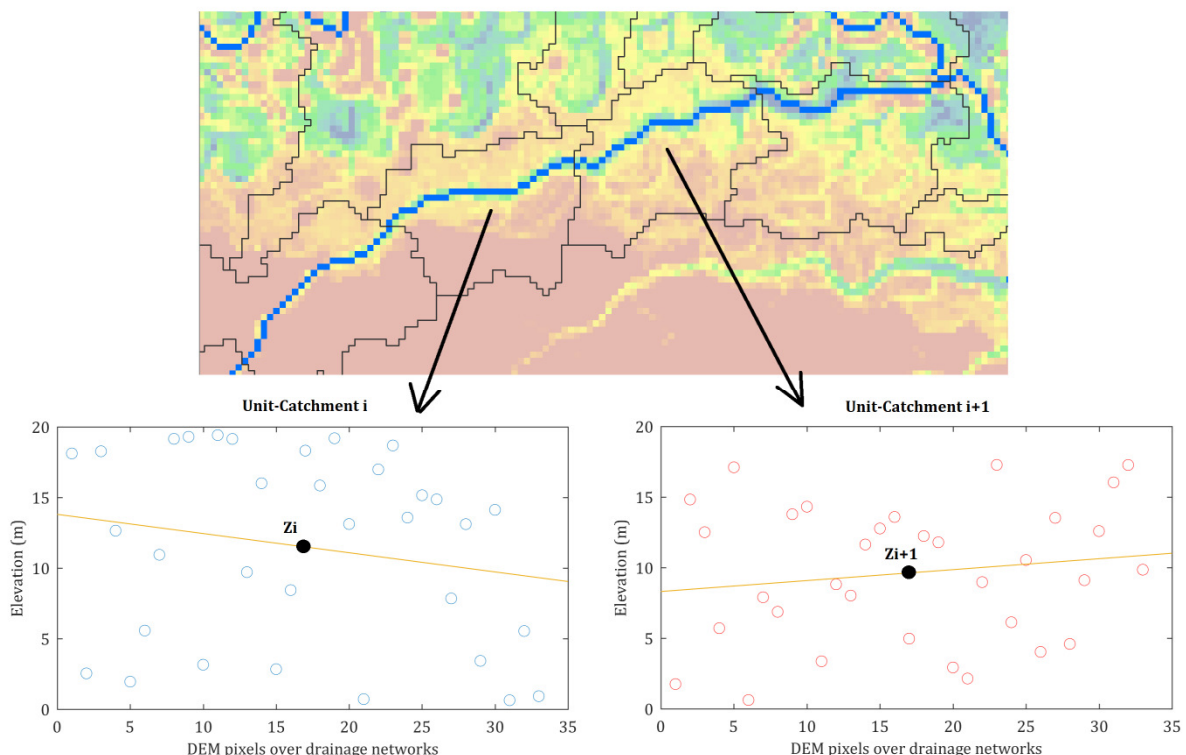

**Figure S1.5.1. Schematic representation of noise reduction in river bed profiles. Circles represent the elevation of DEM pixels located over river networks, which are used to adjust a linear regression (yellow line) within a same unit-catchment. Pixel numbers are ordered from upstream to downstream, so that bank heights are set in the middle of river reaches using the linear regression slope.**

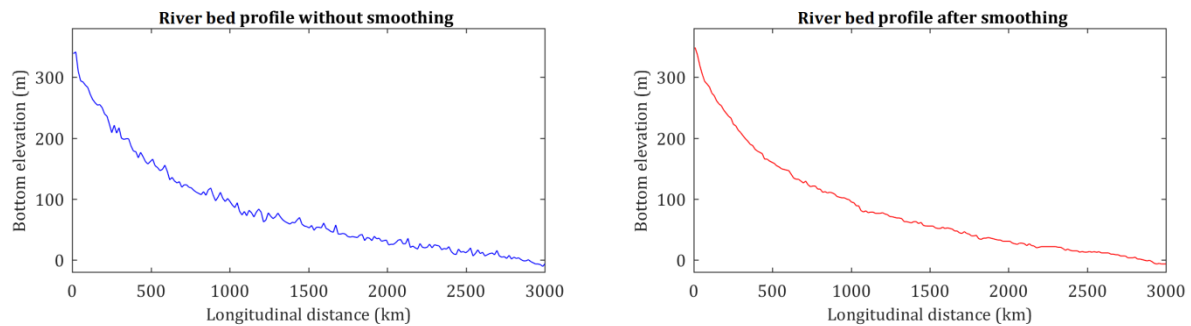

**Figure S1.5.2. Comparison between non-smoothed (left) and smoothed (right) river bed profile extracted from Bare-Earth SRTM. River profiles in this example were extracted for Purus (380000 km<sup>2</sup>) mainstem, a tributary of the Amazon.**

### **S1.6 Sub-grid (or sub- unit-catchment) floodplain topography**

In order to represent floodplain inundation, a hypsometric curve relating flow depth, flooded area and water volume stored in both floodplain and channel for a given unit-catchment is derived from its underlying DEM. Regarding the floodplain, concepts of the HAND model (Rennó et al., 2008) were adopted to compute water volume emulating the inundation process from lower to higher elevations (**Figure S1.6.1**), which is the same approach adopted in CaMa-Flood by Yamazaki et al., (2013).

In this method, pixels characterized as main channels, i.e., over the drainage network, are initially set as null values defining the interface between channel bank height and floodplain region. The relative elevation between a given floodplain pixel and its nearest downstream channel pixel is computed as the height above channel top bank, which means that the pixel is only inundated if floodplain water level (current flow depth subtracted from channel bankfull depth) is equal or exceeds its respective HAND value. Thus, flooded area is calculated summing the individual areas of inundated pixels for a given HAND value, and volume of water stored in floodplain (plus channel below bankfull depth) is then computed considering vertical increments according to DEM vertical resolution. **Figure S1.6.2** shows a schematic representation of channel and floodplains (and their parameters) for a given unit-catchment.



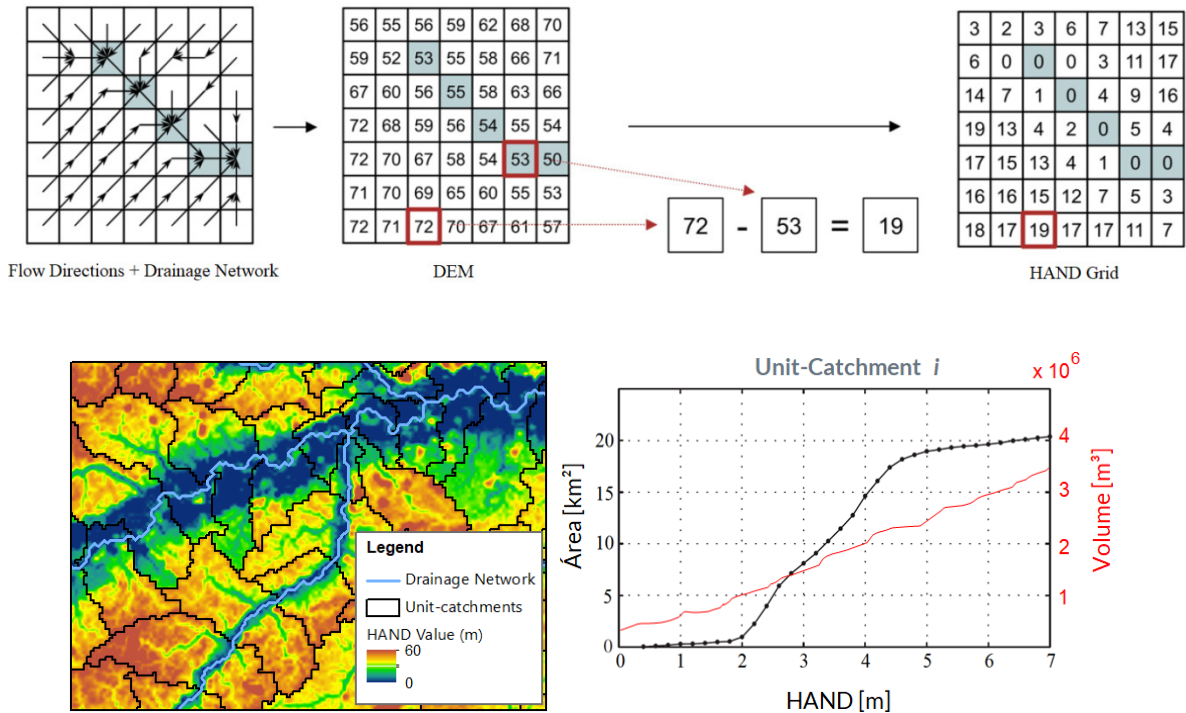

Figure S1.6.1. Procedure to compute sub-grid floodplain profile. Top: Derivation of HAND grid using flow directions, DEM and drainage map extracted from a given area threshold. White and shaded cells represent pixels located over floodplain and drainage networks (channel), respectively (adapted from Rennó et al., 2008). Bottom: Floodplain area and volume are obtained through vertical increments in the HAND Grid, within a given unit-catchment.

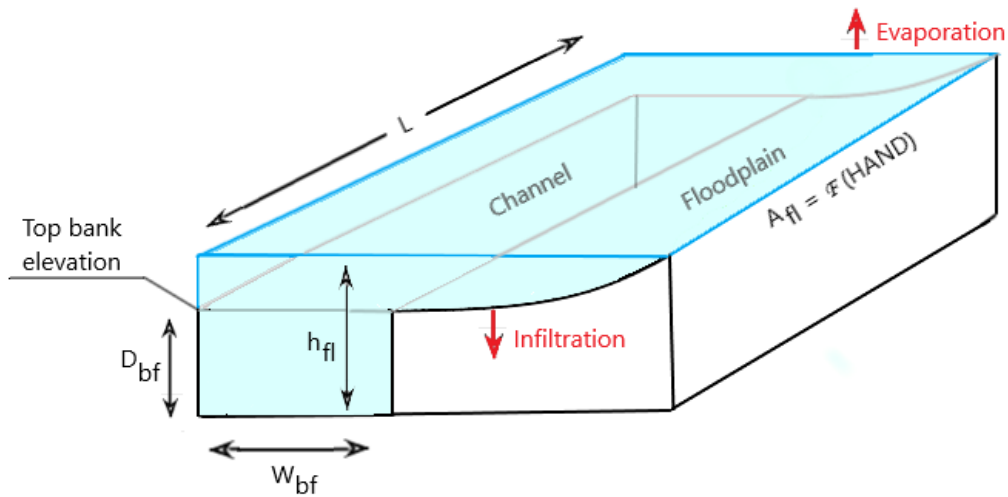

Figure S1.6.2. Schematic representation of channel and floodplain within a given unit-catchment.  $L$  = Channel length;  $D_{bf}$  = Bankfull depth;  $W_{bf}$  = Bankfull Width;  $h_n$  = Flow depth;  $A_n$  = Floodplain area, expressed as a function of HAND value (derived from sub-grid topography).

Following these assumptions, floodplain profiles relating HAND value to flooded area ( $A_{fl}$ ) and flooded volume ( $V_{fl}$ ) are defined as:

$$A_{fl}(z, i) = \sum_{\langle y, x \rangle \in S} A \langle y, x \rangle \quad \text{Eq. S1.6.1}$$

$$V_{fl}(z, i) = W_{bfi} D_{bfi} L_i + \sum_{k=1}^z 0.5 [A_{fl}(k, i) + A_{fl}(k - 1, i)] \Delta z \quad \text{Eq. S1.6.2}$$

Where  $z$  is the HAND value analyzed [m],  $i$  is the unit-catchment analyzed;  $A_{fl}$  is the flooded area above channel top bank, for a given HAND and unit-catchment [ $\text{km}^2$ ];  $V_{fl}$  is the total water stored in the control volume (channel + floodplains), for a given HAND and unit-catchment [ $\text{m}^3$ ],  $\langle y, x \rangle$  are the pixel coordinates, located at row  $y$  and column  $x$ ,  $A \langle y, x \rangle$  is the pixel surface area [ $\text{m}^2$ ],  $S = \{\langle y, x \rangle | UC \langle y, x \rangle = i, HAND \langle y, x \rangle \leq z\}$ ,  $UC \langle y, x \rangle$  is the pixel element from the unit-catchment grid;  $HAND \langle y, x \rangle$  is the pixel element from the HAND grid [m],  $\Delta z$  is the vertical resolution of the HAND grid, equal to 1 m.

Finally, HAND values in the floodplain profile are further converted to water levels, in such a way that the latter are equivalent to HAND plus bankfull depth. For the submerged part of topography (i.e., inside channel), volume is calculated through the numerical integration of flooded area with flow depth, the former approximated by channel width times river length (Pontes et al., 2017). As described in **section S1.2**, this enables flow depths to be derived from stored water volume, by interpolating the channel/floodplain profile for a given unit-catchment.

## **S2. Structure of models (continental and global) evaluated in this study**

General information about the structure of MGB continental model, as well as the global models HTESSSEL/CaMa-Flood, LISFLOOD and WaterGAP3 is summarized in **Table S2.1**.

**Table S2.1. Summary of the structure of models used in this study, acquired from earth2Observe Water Resources Re-analysis run 2 (WRR-2) (Adapted from Schellekens et al., 2017 and Dutra et al., 2017).**

| Model                                    | MGB                                                    | HTESSSEL/CaMa-Flood                     | LISFLOOD                                        | WaterGAP3                |
|------------------------------------------|--------------------------------------------------------|-----------------------------------------|-------------------------------------------------|--------------------------|
| <b>Interception</b>                      | Single reservoir, potential evaporation                | Single reservoir, potential evaporation | Single reservoir, potential evaporation         | Single reservoir         |
| <b>Evaporation</b>                       | Penman–Monteith                                        | Penman–Monteith                         | Penman–Monteith                                 | Priestley–Taylor         |
| <b>Snow</b>                              | No                                                     | Energy balance, single layer (5 layers) | Degree-day, single layer                        | Degree-day, single layer |
| <b>Soil layers</b>                       | Single layer                                           | 9 layers                                | 3 layers                                        | Single layer             |
| <b>Groundwater</b>                       | Yes                                                    | No                                      | Yes                                             | Yes                      |
| <b>Runoff generation</b>                 | Saturation excess                                      | Saturation excess                       | Saturation and infiltration excess              | Beta function            |
| <b>Reservoir/Lakes</b>                   | No                                                     | No                                      | Yes                                             | Yes                      |
| <b>Routing</b>                           | 1D inertial routing (Channel), floodplain as a storage | CaMa-Flood (1D inertial routing)        | 1D Double Kinematic wave (Channel + Floodplain) | Manning–Strickler        |
| <b>Vertical processes in floodplains</b> | Evaporation and infiltration                           | No                                      | No                                              | No                       |
| <b>Water use</b>                         | No                                                     | No                                      | Yes                                             | Yes                      |
| <b>Time step</b>                         | 1 day water and energy balance, CFL for routing        | 1 h                                     | 1 day                                           | 1 day                    |
| <b>Grid/Sub-basin</b>                    | Sub-basin (unit-catchments)                            | Grid                                    | Grid                                            | Grid                     |
| <b>Model resolution</b>                  | Fixed-length (15 km)                                   | 0.25°                                   | 0.1°                                            | 0.0833° (5 arc minutes)  |

### S3. Metrics for individual continental and global models (considering all gauge stations)

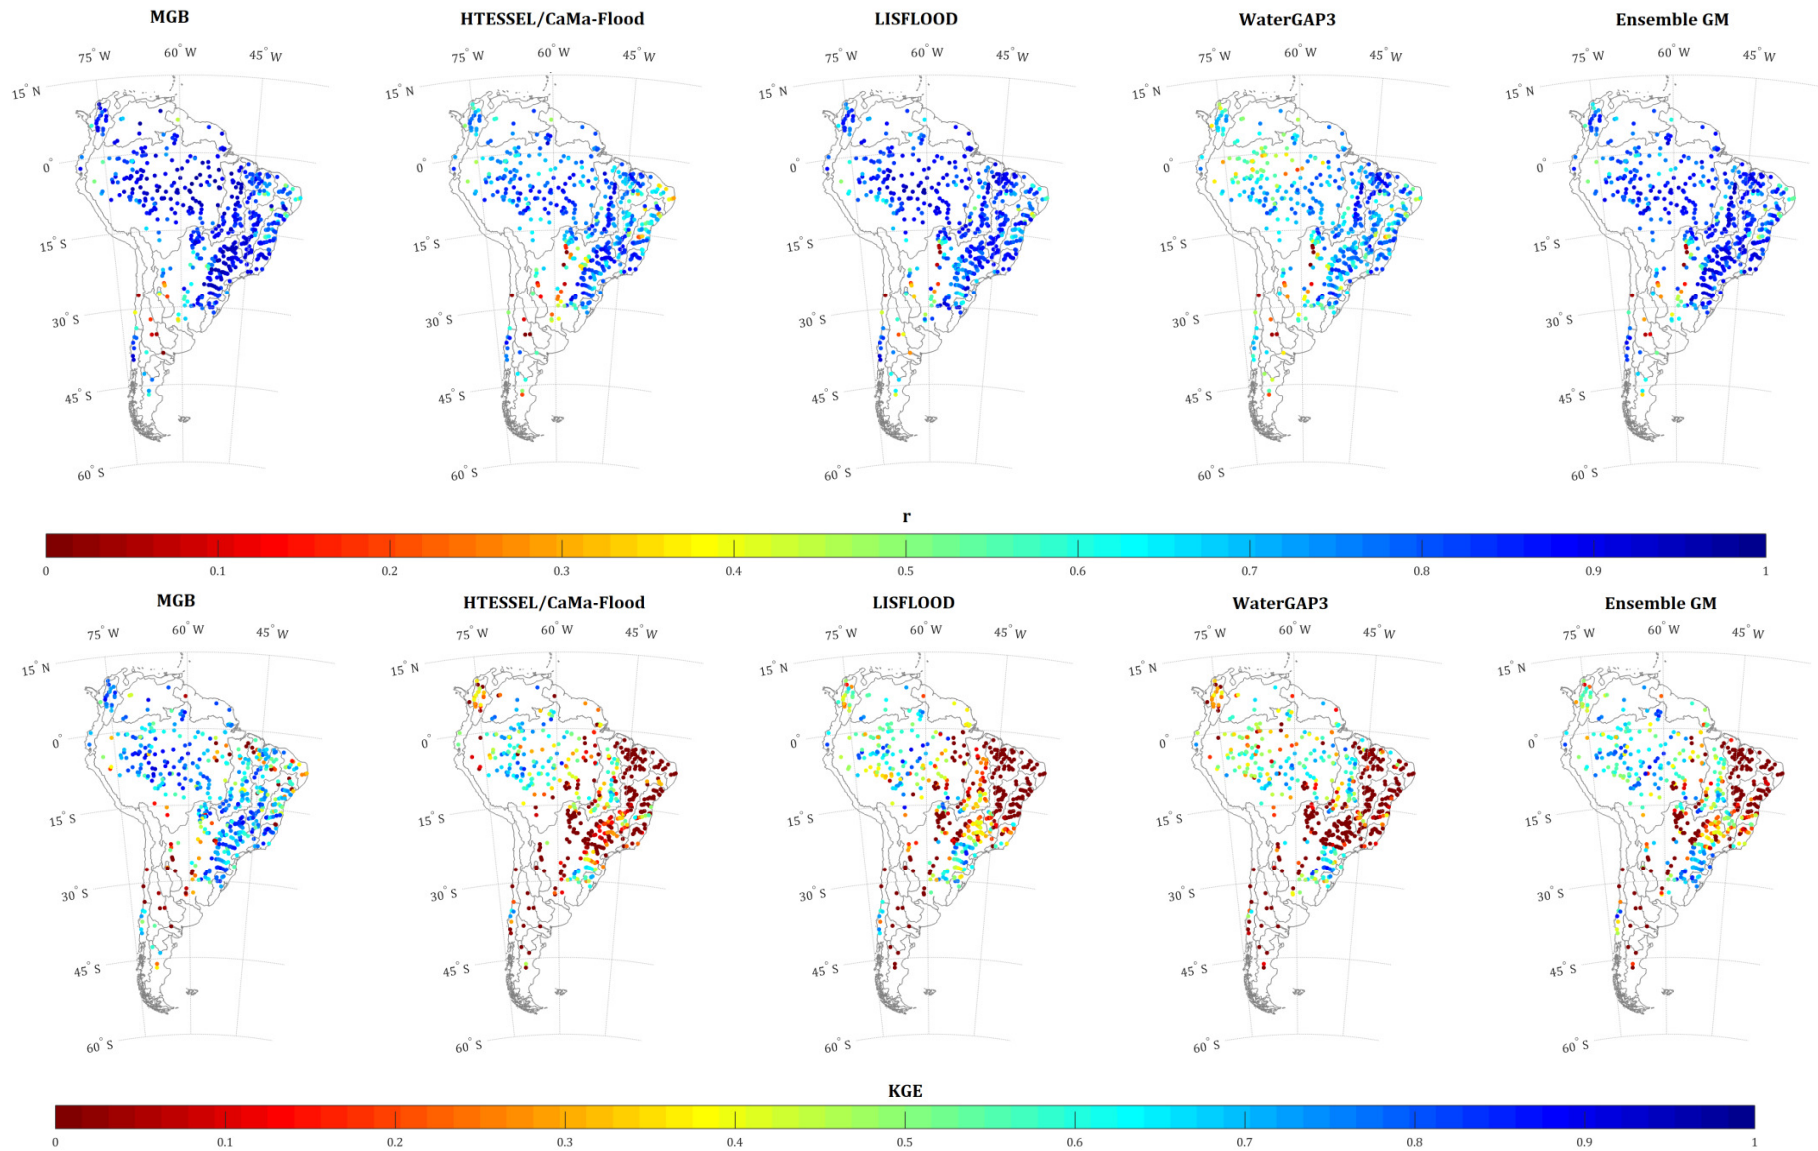

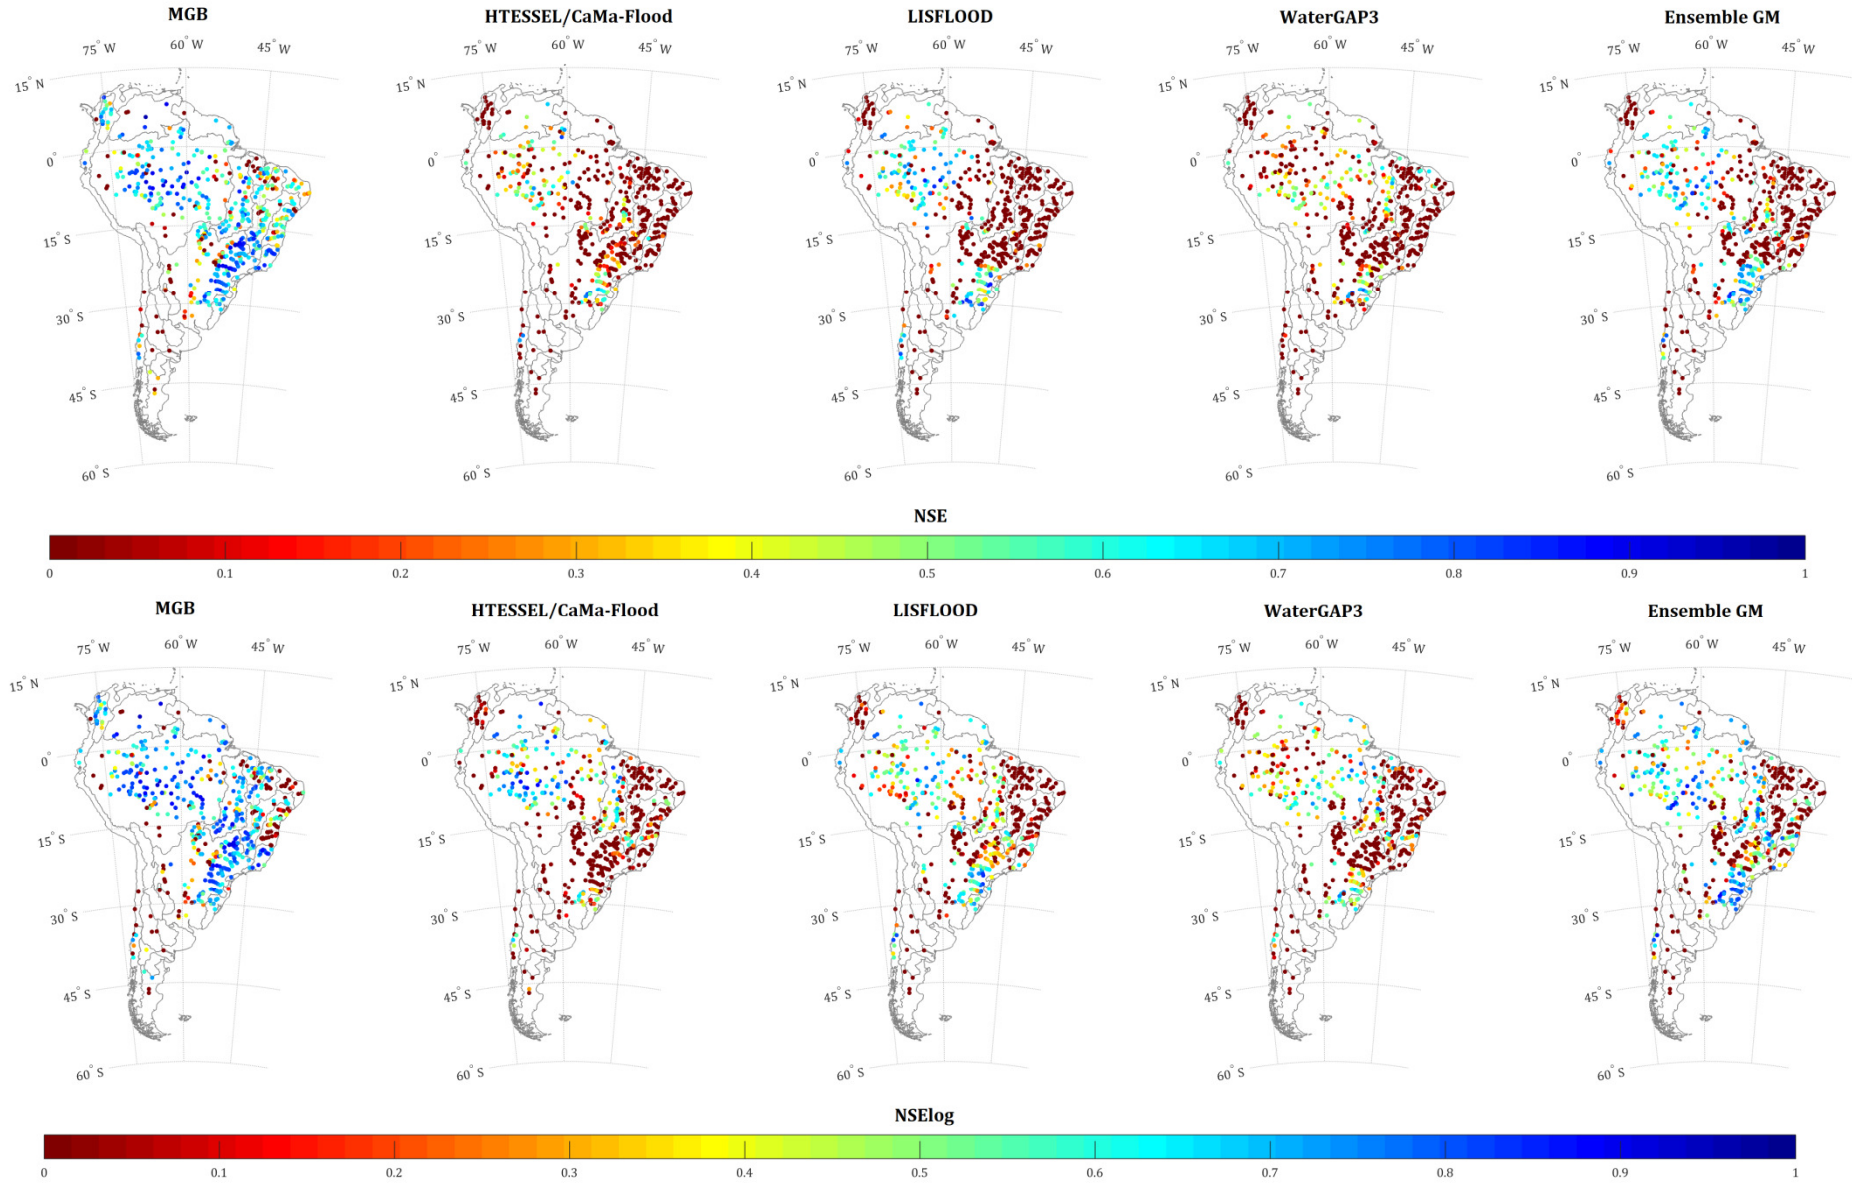

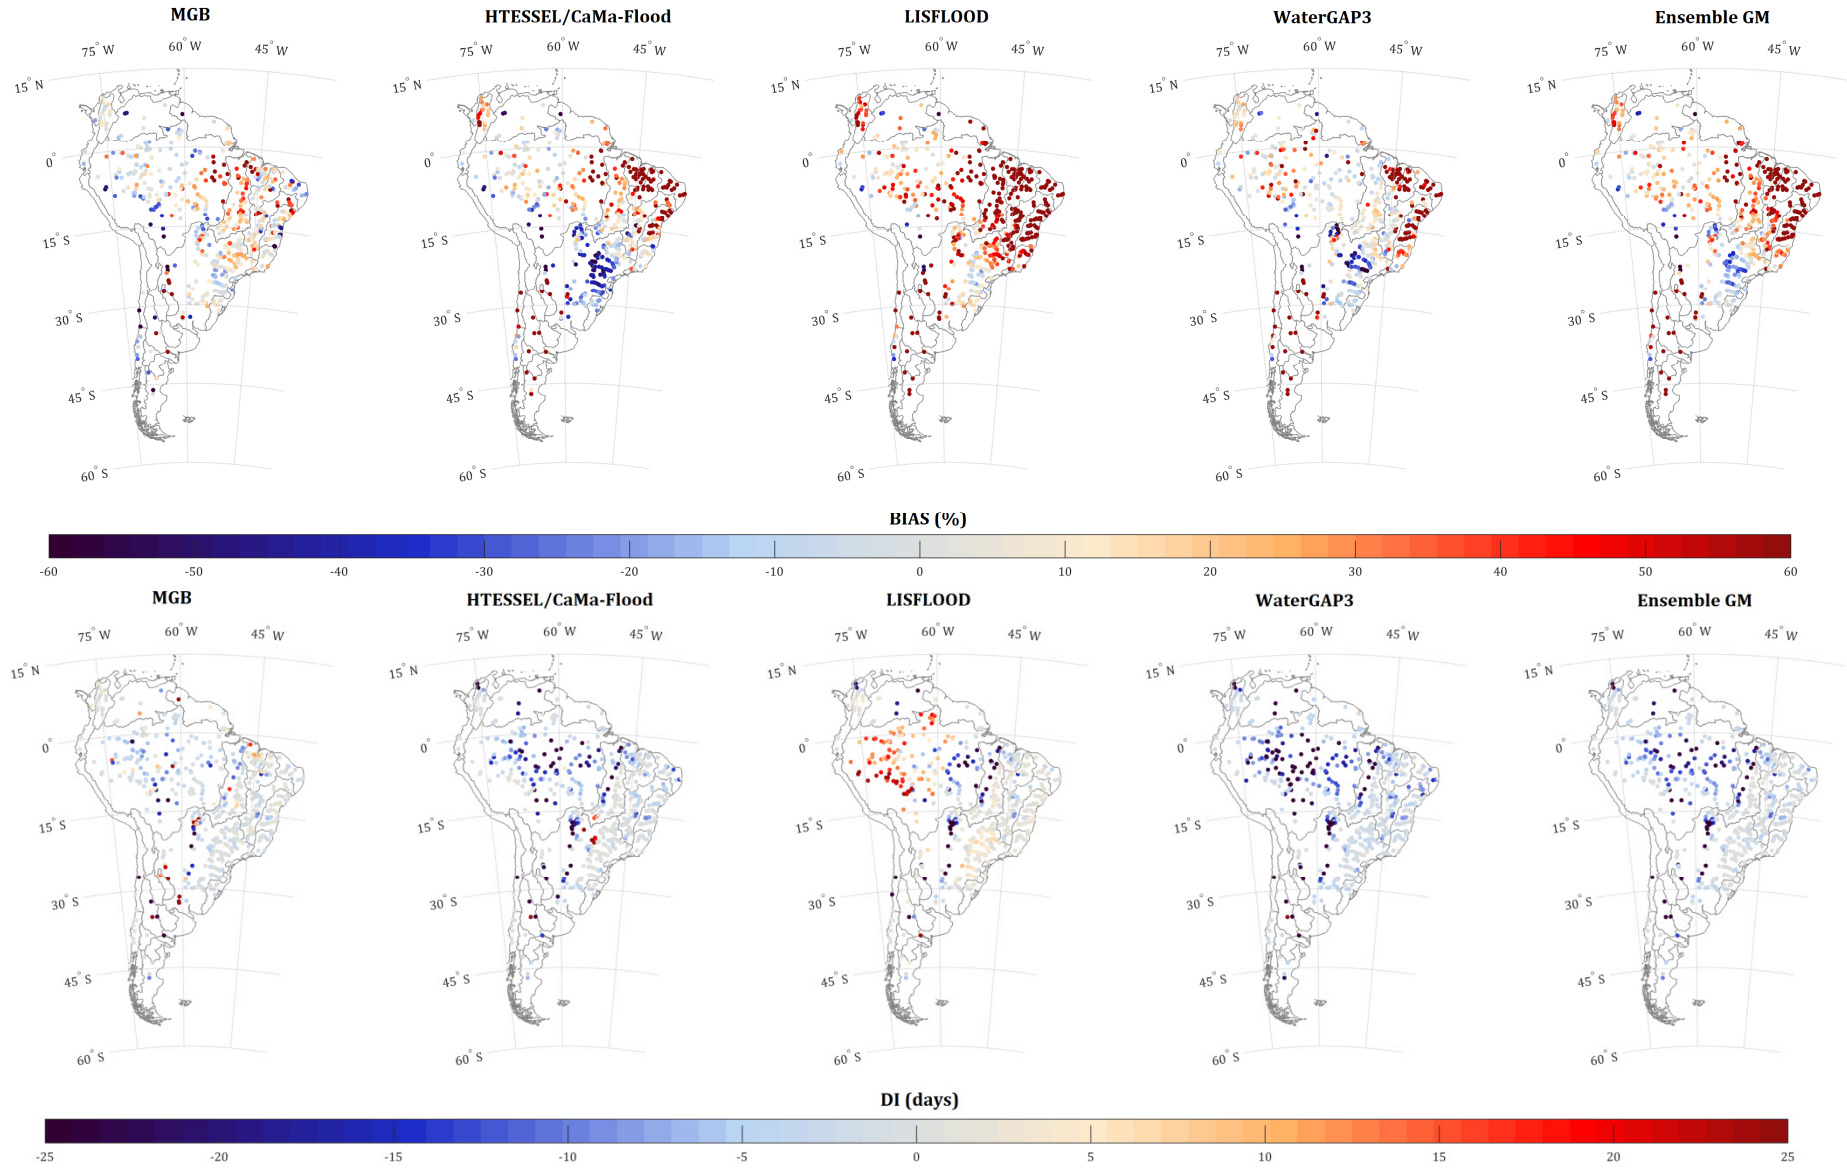

## S4. Station list

**Table S4.1. List of discharge gauge stations used for this study.**

| Data Provider | Code       | Name                                    | Latitude | Longitude |
|---------------|------------|-----------------------------------------|----------|-----------|
| ANA (Brazil)  | '10200000' | 'PALMEIRAS DO JAVARI '                  | -5.133   | -72.800   |
| ANA (Brazil)  | '10300000' | 'SANTA MARIA '                          | -4.567   | -71.417   |
| ANA (Brazil)  | '10500000' | 'ESTIRÃO DO REPOUSO'                    | -4.367   | -70.933   |
| ANA (Brazil)  | '10910000' | 'LADÁRIO - JUSANTE '                    | -4.584   | -70.281   |
| ANA (Brazil)  | '11400000' | 'SÃO PAULO DE OLIVENÇA'                 | -3.450   | -68.750   |
| ANA (Brazil)  | '11444900' | 'IPIRANGA NOVO '                        | -2.867   | -69.667   |
| ANA (Brazil)  | '11450000' | 'IPIRANGA VELHO'                        | -2.983   | -69.583   |
| ANA (Brazil)  | '11500000' | 'SANTO ANTÔNIO DO IÇÁ'                  | -3.083   | -67.933   |
| ANA (Brazil)  | '12100000' | 'COLOCAÇÃO CAXIAS '                     | -5.400   | -69.000   |
| ANA (Brazil)  | '12150000' | 'CONCEIÇÃO (EX. ILHA DA NOVA SORTE)'    | -4.897   | -68.663   |
| ANA (Brazil)  | '12180000' | 'TANIBUCA'                              | -4.745   | -68.135   |
| ANA (Brazil)  | '12200000' | 'BARREIRA ALTA '                        | -4.221   | -67.893   |
| ANA (Brazil)  | '12240000' | 'PORTO SEGURO'                          | -3.337   | -67.492   |
| ANA (Brazil)  | '12370000' | 'TAUMATURGO'                            | -8.946   | -72.795   |
| ANA (Brazil)  | '12500000' | 'CRUZEIRO DO SUL '                      | -7.611   | -72.681   |
| ANA (Brazil)  | '12520000' | 'IPIXUNA'                               | -7.051   | -71.684   |
| ANA (Brazil)  | '12550000' | 'EIRUNEPÉ - MONTANTE '                  | -6.684   | -69.881   |
| ANA (Brazil)  | '12600001' | 'TARAUACÁ - JUSANTE'                    | -8.136   | -70.717   |
| ANA (Brazil)  | '12640000' | 'SERINGAL SÃO FRANCISCO (SANTA HELENA)' | -8.686   | -70.551   |
| ANA (Brazil)  | '12650000' | 'FEIJÓ'                                 | -8.152   | -70.368   |
| ANA (Brazil)  | '12680000' | 'ENVIRA '                               | -7.428   | -70.023   |
| ANA (Brazil)  | '12700000' | 'SANTOS DUMONT'                         | -6.440   | -68.246   |
| ANA (Brazil)  | '12840000' | 'GAVIÃO'                                | -4.839   | -66.849   |
| ANA (Brazil)  | '12845000' | 'VILA BITTENCOURT '                     | -1.400   | -69.417   |
| ANA (Brazil)  | '12850000' | 'ACANAUI '                              | -1.817   | -66.600   |
| ANA (Brazil)  | '12880000' | 'ESTIRÃO DA SANTA CRUZ '                | -4.321   | -65.201   |
| ANA (Brazil)  | '13150000' | 'ITAPEUÁ '                              | -4.058   | -63.028   |
| ANA (Brazil)  | '13180000' | 'MANOEL URBANO '                        | -8.884   | -69.268   |
| ANA (Brazil)  | '13300000' | 'SERINGAL SÃO JOSÉ '                    | -9.319   | -68.718   |
| ANA (Brazil)  | '13410000' | 'SERINGAL DA CARIDADE '                 | -9.044   | -68.577   |
| ANA (Brazil)  | '13600002' | 'RIO BRANCO'                            | -9.976   | -67.800   |
| ANA (Brazil)  | '13650000' | 'FLORIANO PEIXOTO'                      | -9.051   | -67.368   |
| ANA (Brazil)  | '13710001' | 'VALPARAÍSO - MONTANTE'                 | -8.683   | -67.400   |
| ANA (Brazil)  | '13740000' | 'FAZENDA BORANGABA '                    | -7.550   | -67.550   |
| ANA (Brazil)  | '13750000' | 'SERINGAL FORTALEZA '                   | -7.717   | -66.985   |
| ANA (Brazil)  | '13849000' | 'JURENÉ'                                | -8.768   | -65.884   |

| <b>Data Provider</b> | <b>Code</b> | <b>Name</b>                           | <b>Latitude</b> | <b>Longitude</b> |
|----------------------|-------------|---------------------------------------|-----------------|------------------|
| ANA (Brazil)         | '13880000'  | 'CANUTAMA '                           | -6.534          | -64.384          |
| ANA (Brazil)         | '13886000'  | 'BACABA '                             | -6.317          | -64.884          |
| ANA (Brazil)         | '14110000'  | 'CUCUÍ'                               | 1.215           | -66.853          |
| ANA (Brazil)         | '14230000'  | 'MISSÃO IÇANA '                       | 1.074           | -67.595          |
| ANA (Brazil)         | '14250000'  | 'SÃO FELIPE'                          | 0.372           | -67.313          |
| ANA (Brazil)         | '14260000'  | 'UARAÇU'                              | 0.477           | -69.128          |
| ANA (Brazil)         | '14280001'  | 'TARAQUA '                            | 0.130           | -68.539          |
| ANA (Brazil)         | '14325000'  | 'TUMBIRA'                             | -0.344          | -67.536          |
| ANA (Brazil)         | '14330000'  | 'CURICURIARI'                         | -0.200          | -66.801          |
| ANA (Brazil)         | '14350000'  | 'JUSANTE DA CACHOEIRA<br>DO CAJU'     | -0.244          | -67.016          |
| ANA (Brazil)         | '14420000'  | 'SERRINHA'                            | -0.482          | -64.827          |
| ANA (Brazil)         | '14440000'  | 'POSTO AJURICABA '                    | 0.884           | -62.622          |
| ANA (Brazil)         | '14450000'  | 'JALAUACA'                            | -0.301          | -62.762          |
| ANA (Brazil)         | '14488000'  | 'UAICAS '                             | 3.550           | -63.169          |
| ANA (Brazil)         | '14495000'  | 'FAZENDA CAJUPIRANGA '                | 3.438           | -61.037          |
| ANA (Brazil)         | '14515000'  | 'FAZENDA PASSARÃO'                    | 3.208           | -60.571          |
| ANA (Brazil)         | '14680001'  | 'FÉ E ESPERANÇA '                     | 2.871           | -61.441          |
| ANA (Brazil)         | '14690000'  | 'MUCAJÁÍ'                             | 2.471           | -60.918          |
| ANA (Brazil)         | '15030000'  | 'JATUARANA'                           | -3.052          | -59.678          |
| ANA (Brazil)         | '15120001'  | 'VILA BELA DA<br>SANTÍSSIMA TRINDADE' | -15.008         | -59.949          |
| ANA (Brazil)         | '15130000'  | 'PIMENTEIRAS'                         | -13.480         | -61.046          |
| ANA (Brazil)         | '15150000'  | 'PEDRAS NEGRAS'                       | -12.851         | -62.899          |
| ANA (Brazil)         | '15250000'  | 'GUAJARÁ-MIRIM '                      | -10.793         | -65.348          |
| ANA (Brazil)         | '15320002'  | 'ABUNÃ'                               | -9.703          | -65.365          |
| ANA (Brazil)         | '15326000'  | 'MORADA NOVA -<br>JUSANTE'            | -9.785          | -65.528          |
| ANA (Brazil)         | '15550000'  | 'SANTA ISABEL '                       | -8.799          | -63.711          |
| ANA (Brazil)         | '15558000'  | 'PIMENTA BUENO'                       | -11.684         | -61.192          |
| ANA (Brazil)         | '15559000'  | 'SÍTIO BELA VISTA'                    | -11.653         | -61.215          |
| ANA (Brazil)         | '15560000'  | 'JIPARANÁ '                           | -10.874         | -61.936          |
| ANA (Brazil)         | '15580000'  | 'TABAJARA '                           | -8.933          | -62.054          |
| ANA (Brazil)         | '15630000'  | 'HUMAITÁ '                            | -7.505          | -63.020          |
| ANA (Brazil)         | '15670000'  | 'NOVA ESPERANÇA '                     | -6.359          | -61.766          |
| ANA (Brazil)         | '15700000'  | 'MANICORÉ '                           | -5.817          | -61.302          |
| ANA (Brazil)         | '15750000'  | 'HUMBOLDT'                            | -10.168         | -59.464          |
| ANA (Brazil)         | '15795000'  | 'LEONTINO'                            | -7.767          | -60.567          |
| ANA (Brazil)         | '15800000'  | 'BOCA DO GUARIBA '                    | -7.708          | -60.586          |
| ANA (Brazil)         | '15820000'  | 'CONCISA '                            | -9.800          | -60.691          |
| ANA (Brazil)         | '15828000'  | 'FAZENDA BOA<br>LEMBRANÇA '           | -7.650          | -60.833          |
| ANA (Brazil)         | '15830000'  | 'PRAINHA VELHA '                      | -7.208          | -60.650          |
| ANA (Brazil)         | '15910000'  | 'SANTAREM SUCUNDURI'                  | -6.796          | -59.042          |
| ANA (Brazil)         | '16205000'  | 'BASE SIDERAMA -                      | -1.683          | -58.533          |



| <b>Data Provider</b> | <b>Code</b> | <b>Name</b>                      | <b>Latitude</b> | <b>Longitude</b> |
|----------------------|-------------|----------------------------------|-----------------|------------------|
|                      |             | JUSANTE '                        |                 |                  |
| ANA (Brazil)         | '16430000'  | 'GARGANTA'                       | -0.998          | -57.043          |
| ANA (Brazil)         | '16460000'  | 'CARAMUJO'                       | -1.065          | -57.061          |
| ANA (Brazil)         | '16480000'  | 'ALDEIA WAI-WA '                 | -0.695          | -57.975          |
| ANA (Brazil)         | '16500000'  | 'ESTIRÃO DA ANGÉLICA'            | -1.101          | -57.057          |
| ANA (Brazil)         | '17090000'  | 'BOCA DO INFERNO '               | -1.503          | -54.873          |
| ANA (Brazil)         | '17093000'  | 'FONTANILHAS'                    | -11.358         | -58.343          |
| ANA (Brazil)         | '17095000'  | 'FAZENDA TOMBADOR '              | -11.777         | -58.073          |
| ANA (Brazil)         | '17120000'  | 'PORTO DOS GAUCHOS'              | -11.536         | -57.423          |
| ANA (Brazil)         | '17122000'  | 'RIO DOS PEIXES'                 | -10.823         | -57.726          |
| ANA (Brazil)         | '17123000'  | 'RIO ARINOS'                     | -10.640         | -58.003          |
| ANA (Brazil)         | '17200000'  | 'PORTO RONCADOR '                | -13.557         | -55.334          |
| ANA (Brazil)         | '17210000'  | 'TELES PIRES '                   | -12.674         | -55.792          |
| ANA (Brazil)         | '17280000'  | 'CACHOEIRÃO '                    | -11.651         | -55.703          |
| ANA (Brazil)         | '17300000'  | 'FAZENDA TRATEX'                 | -10.956         | -55.549          |
| ANA (Brazil)         | '17340000'  | 'INDECO'                         | -10.113         | -55.570          |
| ANA (Brazil)         | '17380000'  | 'JUSANTE FOZ PEIXOTO DE AZEVEDO' | -9.643          | -56.018          |
| ANA (Brazil)         | '17410000'  | 'SANTA ROSA '                    | -8.860          | -57.420          |
| ANA (Brazil)         | '17420000'  | 'TRÊS MARIAS'                    | -7.615          | -57.950          |
| ANA (Brazil)         | '17430000'  | 'BARRA DO SÃO MANUEL - JUSANTE'  | -7.340          | -58.155          |
| ANA (Brazil)         | '17500000'  | 'FORTALEZA '                     | -6.045          | -57.643          |
| ANA (Brazil)         | '17650002'  | 'ACARÁ DO TAPAJÓS'               | -4.886          | -56.723          |
| ANA (Brazil)         | '17675000'  | 'JARDIM DO OURO'                 | -6.258          | -55.773          |
| ANA (Brazil)         | '17730000'  | 'ITAITUBA '                      | -4.283          | -55.983          |
| ANA (Brazil)         | '18200000'  | 'ARAPARI '                       | -1.779          | -54.397          |
| ANA (Brazil)         | '18415000'  | 'POUSADA MATRINXA '              | -13.569         | -53.076          |
| ANA (Brazil)         | '18436000'  | 'JUSANTE RIO PRETO'              | -10.047         | -52.114          |
| ANA (Brazil)         | '18460000'  | 'BOA SORTE '                     | -6.750          | -51.983          |
| ANA (Brazil)         | '18500000'  | 'BOA ESPERANÇA'                  | -6.719          | -51.783          |
| ANA (Brazil)         | '18510000'  | 'SÃO FELIX DO XINGU'             | -6.600          | -52.050          |
| ANA (Brazil)         | '18520000'  | 'BELO HORIZONTE'                 | -5.408          | -52.902          |
| ANA (Brazil)         | '18590000'  | 'MANOEL JORGE (TERRA PRETA)'     | -6.203          | -54.074          |
| ANA (Brazil)         | '18650000'  | 'CAJUEIRO'                       | -5.654          | -54.521          |
| ANA (Brazil)         | '18700000'  | 'PEDRA DO Ó'                     | -4.542          | -54.001          |
| ANA (Brazil)         | '18850000'  | 'ALTAMIRA'                       | -3.212          | -52.211          |
| ANA (Brazil)         | '18870000'  | 'ALDEIA BACAJÁ'                  | -4.916          | -51.428          |
| ANA (Brazil)         | '19150000'  | 'SÃO FRANCISCO '                 | -0.568          | -52.569          |
| ANA (Brazil)         | '20050000'  | 'PONTE QUEBRA LINHA'             | -14.978         | -48.676          |
| ANA (Brazil)         | '20250000'  | 'CERES (POSTO BIQUINHA)'         | -15.309         | -49.553          |
| ANA (Brazil)         | '20490000'  | 'COLÔNIA DOS AMERICANOS'         | -14.740         | -49.064          |
| ANA (Brazil)         | '20500000'  | 'PORTO URUAÇU'                   | -14.519         | -49.042          |

| <b>Data Provider</b> | <b>Code</b> | <b>Name</b>                            | <b>Latitude</b> | <b>Longitude</b> |
|----------------------|-------------|----------------------------------------|-----------------|------------------|
| ANA (Brazil)         | '21050000'  | 'SÃO FELIX (A/B)'                      | -13.533         | -48.138          |
| ANA (Brazil)         | '21500000'  | 'NOVA ROMA<br>(FAZ.SUCURI)'            | -13.763         | -46.838          |
| ANA (Brazil)         | '21600000'  | 'PONTE PARANÃ'                         | -13.424         | -47.132          |
| ANA (Brazil)         | '21650000'  | 'MONTANTE DA BARRA DO<br>PALMA'        | -12.603         | -47.861          |
| ANA (Brazil)         | '21850000'  | 'RIO DA PALMA'                         | -12.416         | -47.199          |
| ANA (Brazil)         | '21890000'  | 'BARRA DO PALMA'                       | -12.603         | -47.861          |
| ANA (Brazil)         | '21900000'  | 'PARANÃ '                              | -12.622         | -47.886          |
| ANA (Brazil)         | '22150000'  | 'JACINTO'                              | -11.981         | -48.658          |
| ANA (Brazil)         | '22220000'  | 'PORTO JERÔNIMO - FAZ.<br>PIRACICABA ' | -11.759         | -47.836          |
| ANA (Brazil)         | '22250000'  | 'FAZENDA LOBEIRA'                      | -11.533         | -48.289          |
| ANA (Brazil)         | '22350000'  | 'PORTO NACIONAL '                      | -10.704         | -48.418          |
| ANA (Brazil)         | '22680000'  | 'JATOBÁ (FAZENDA BOA<br>NOVA) '        | -9.995          | -47.473          |
| ANA (Brazil)         | '22700000'  | 'NOVO ACORDO'                          | -9.963          | -47.675          |
| ANA (Brazil)         | '22900000'  | 'PORTO REAL'                           | -9.307          | -47.929          |
| ANA (Brazil)         | '23100000'  | 'TUPIRATINS'                           | -8.392          | -48.111          |
| ANA (Brazil)         | '23250000'  | 'GOIATINS'                             | -7.708          | -47.312          |
| ANA (Brazil)         | '23300000'  | 'CAROLINA'                             | -7.338          | -47.473          |
| ANA (Brazil)         | '23600000'  | 'TOCANTINÓPOLIS'                       | -6.289          | -47.392          |
| ANA (Brazil)         | '23700000'  | 'DESCARRETO'                           | -5.789          | -47.469          |
| ANA (Brazil)         | '24200000'  | 'TORIXOREU'                            | -16.201         | -52.550          |
| ANA (Brazil)         | '24700000'  | 'BARRA DO GARÇAS<br>(ARAGARÇAS)'       | -15.891         | -52.228          |
| ANA (Brazil)         | '24800000'  | 'PERES'                                | -15.890         | -51.853          |
| ANA (Brazil)         | '24850000'  | 'ARAGUAIANA'                           | -15.738         | -51.828          |
| ANA (Brazil)         | '24950000'  | 'MONTES CLAROS DE<br>GOIÁS'            | -15.572         | -51.634          |
| ANA (Brazil)         | '25200000'  | 'ARUANÃ'                               | -14.902         | -51.082          |
| ANA (Brazil)         | '25700000'  | 'BANDEIRANTES'                         | -13.690         | -50.800          |
| ANA (Brazil)         | '25800000'  | 'JUSANTE DO RIO<br>PINTADO'            | -13.561         | -50.401          |
| ANA (Brazil)         | '25950000'  | 'LUIZ ALVES'                           | -13.210         | -50.585          |
| ANA (Brazil)         | '26015000'  | 'JUSANTE BARRA DO<br>FORQUILHA'        | -12.884         | -50.832          |
| ANA (Brazil)         | '26050000'  | 'TORIQUEJE'                            | -15.249         | -53.055          |
| ANA (Brazil)         | '26100000'  | 'XAVANTINA '                           | -14.672         | -52.355          |
| ANA (Brazil)         | '26200000'  | 'TRECHO MÉDIO'                         | -14.087         | -51.696          |
| ANA (Brazil)         | '26300000'  | 'SANTO ANTÔNIO DO<br>LEVERGER'         | -12.292         | -50.963          |
| ANA (Brazil)         | '26350000'  | 'SÃO FELIX DO ARAGUAIA '               | -11.620         | -50.663          |
| ANA (Brazil)         | '26800000'  | 'BARREIRA DA CRUZ '                    | -10.565         | -49.934          |
| ANA (Brazil)         | '27500000'  | 'CONCEIÇÃO DO<br>ARAGUAIA'             | -8.269          | -49.259          |

| <b>Data Provider</b> | <b>Code</b> | <b>Name</b>              | <b>Latitude</b> | <b>Longitude</b> |
|----------------------|-------------|--------------------------|-----------------|------------------|
| ANA (Brazil)         | '28300000'  | 'XAMBIOÁ '               | -6.410          | -48.542          |
| ANA (Brazil)         | '28850000'  | 'ARAGUATINS'             | -5.634          | -48.130          |
| ANA (Brazil)         | '29050000'  | 'MARABÁ '                | -5.339          | -49.124          |
| ANA (Brazil)         | '29100000'  | 'FAZENDA ALEGRIA'        | -5.514          | -49.221          |
| ANA (Brazil)         | '29200000'  | 'ITUPIRANGA '            | -5.128          | -49.324          |
| ANA (Brazil)         | '30080000'  | 'CAPIVARA'               | 1.071           | -51.671          |
| ANA (Brazil)         | '30300000'  | 'SERRA DO NAVIO '        | 0.901           | -52.010          |
| ANA (Brazil)         | '30400000'  | 'PORTO PLATON'           | 0.708           | -51.439          |
| ANA (Brazil)         | '31680000'  | 'FAZENDA MARINGA '       | -3.161          | -48.099          |
| ANA (Brazil)         | '31700000'  | 'BADAJÓS'                | -2.513          | -47.768          |
| ANA (Brazil)         | '32540000'  | 'FAZENDA RURAL ZEBU'     | -3.341          | -46.877          |
| ANA (Brazil)         | '32620000'  | 'ALTO BONITO'            | -1.801          | -46.316          |
| ANA (Brazil)         | '33070000'  | 'FAZENDA VARIG'          | -4.213          | -46.495          |
| ANA (Brazil)         | '33080000'  | 'ALTO ALEGRE'            | -3.665          | -45.842          |
| ANA (Brazil)         | '33190000'  | 'PINDARÉ-MIRIM '         | -3.661          | -45.458          |
| ANA (Brazil)         | '33250000'  | 'BARRA DO CORDA '        | -5.500          | -45.243          |
| ANA (Brazil)         | '33260000'  | 'SANTA VITÓRIA'          | -5.106          | -44.961          |
| ANA (Brazil)         | '33281000'  | 'PEDREIRAS II'           | -4.567          | -44.600          |
| ANA (Brazil)         | '33286000'  | 'SÃO LUIZ GONZAGA'       | -4.383          | -44.667          |
| ANA (Brazil)         | '33290000'  | 'BACABAL '               | -4.219          | -44.765          |
| ANA (Brazil)         | '33333000'  | 'ITAIPAVA'               | -5.144          | -45.795          |
| ANA (Brazil)         | '33365000'  | 'FAZENDA SABESA'         | -4.538          | -45.326          |
| ANA (Brazil)         | '33380000'  | 'ARATOI GRANDE'          | -3.770          | -45.218          |
| ANA (Brazil)         | '33480000'  | 'COLINAS'                | -6.019          | -44.243          |
| ANA (Brazil)         | '33530000'  | 'MONTEVIDEU'             | -5.337          | -43.884          |
| ANA (Brazil)         | '33550000'  | 'CAXIAS'                 | -4.865          | -43.358          |
| ANA (Brazil)         | '33590000'  | 'CODÓ '                  | -4.458          | -43.875          |
| ANA (Brazil)         | '33630000'  | 'COROATA'                | -4.128          | -44.128          |
| ANA (Brazil)         | '33680000'  | 'CANTANHEDE'             | -3.628          | -44.379          |
| ANA (Brazil)         | '33780000'  | 'NINA RODRIGUES'         | -3.459          | -43.899          |
| ANA (Brazil)         | '34020000'  | 'ALTO PARNAÍBA'          | -9.113          | -45.926          |
| ANA (Brazil)         | '34040000'  | 'FAZENDA PARACATI'       | -8.281          | -45.667          |
| ANA (Brazil)         | '34040500'  | 'FAZENDA PARACATI II'    | -8.271          | -45.668          |
| ANA (Brazil)         | '34060000'  | 'RIBEIRO GONÇALVES'      | -7.567          | -45.254          |
| ANA (Brazil)         | '34070000'  | 'SÍTIO DO VELHO'         | -7.381          | -44.827          |
| ANA (Brazil)         | '34090000'  | 'FAZENDA BANDEIRA'       | -7.391          | -44.614          |
| ANA (Brazil)         | '34170000'  | 'SÃO FÉLIX DE BALSAS'    | -7.068          | -44.813          |
| ANA (Brazil)         | '34251000'  | 'CRISTINO CASTRO II'     | -8.793          | -44.206          |
| ANA (Brazil)         | '34270000'  | 'BARRA DO LANCE'         | -7.248          | -43.643          |
| ANA (Brazil)         | '34470000'  | 'SANTA CRUZ DO PIAUÍ'    | -7.190          | -41.770          |
| ANA (Brazil)         | '34471000'  | 'SANTA CRUZ DO PIAUÍ II' | -7.189          | -41.770          |
| ANA (Brazil)         | '34480000'  | 'FAZENDA TALHADA'        | -6.973          | -42.106          |
| ANA (Brazil)         | '34571000'  | 'SÃO FRANCISCO DO PIAUÍ' | -7.233          | -42.544          |

| <b>Data Provider</b> | <b>Code</b> | <b>Name</b>                     | <b>Latitude</b> | <b>Longitude</b> |
|----------------------|-------------|---------------------------------|-----------------|------------------|
| ANA (Brazil)         | '34600000'  | 'FRANCISCO AYRES'               | -6.625          | -42.698          |
| ANA (Brazil)         | '34750000'  | 'FAZENDA BOA<br>ESPERANÇA'      | -5.223          | -41.738          |
| ANA (Brazil)         | '34760000'  | 'FAZENDA CARNAIBA'              | -5.714          | -42.100          |
| ANA (Brazil)         | '34770000'  | 'PRATA DO PIAUÍ'                | -5.666          | -42.214          |
| ANA (Brazil)         | '34789000'  | 'FAZENDA CANTINHO II'           | -5.203          | -42.697          |
| ANA (Brazil)         | '34879500'  | 'LUZILÂNDIA'                    | -3.454          | -42.370          |
| ANA (Brazil)         | '34940000'  | 'ESPERANTINA'                   | -3.903          | -42.230          |
| ANA (Brazil)         | '34980000'  | 'TINGUIS'                       | -3.724          | -41.974          |
| ANA (Brazil)         | '35275000'  | 'SOBRAL'                        | -3.689          | -40.341          |
| ANA (Brazil)         | '36070000'  | 'SÍTIO PATOS'                   | -6.521          | -39.639          |
| ANA (Brazil)         | '36160000'  | 'IGUATU'                        | -6.373          | -39.293          |
| ANA (Brazil)         | '36290000'  | 'ICÓ'                           | -6.406          | -38.867          |
| ANA (Brazil)         | '36320000'  | 'JAGUARIBE'                     | -5.901          | -38.632          |
| ANA (Brazil)         | '36390000'  | 'PEIXE GORDO'                   | -5.229          | -38.199          |
| ANA (Brazil)         | '36580000'  | 'MORADA NOVA II'                | -5.121          | -38.444          |
| ANA (Brazil)         | '37410000'  | 'SÍTIO VASSOURAS'               | -6.729          | -37.794          |
| ANA (Brazil)         | '37470000'  | 'JARDIM DE PIRANHAS '           | -6.378          | -37.353          |
| ANA (Brazil)         | '37710150'  | 'SÍTIO ACAUA II'                | -5.616          | -36.891          |
| ANA (Brazil)         | '38860000'  | 'BODOCONGO'                     | -7.528          | -36.000          |
| ANA (Brazil)         | '38880000'  | 'GUARITA'                       | -7.334          | -35.373          |
| ANA (Brazil)         | '38895000'  | 'PONTE DA BATALHA'              | -7.130          | -35.048          |
| ANA (Brazil)         | '40070000'  | 'PONTE DO CHUMBO'               | -19.776         | -45.479          |
| ANA (Brazil)         | '40100000'  | 'PORTO DAS ANDORINHAS'          | -19.279         | -45.286          |
| ANA (Brazil)         | '41650002'  | 'PONTE DO LICÍNIO -<br>JUSANTE' | -18.673         | -44.194          |
| ANA (Brazil)         | '41818000'  | 'SANTO HIPÓLITO<br>(ANA/CEMIG)' | -18.306         | -44.226          |
| ANA (Brazil)         | '41990000'  | 'VÁRZEA DA PALMA'               | -17.595         | -44.714          |
| ANA (Brazil)         | '42395000'  | 'SANTA ROSA'                    | -17.255         | -46.473          |
| ANA (Brazil)         | '42690001'  | 'PORTO DA EXTREMA'              | -17.030         | -46.014          |
| ANA (Brazil)         | '42750000'  | 'CAATINGA '                     | -17.143         | -45.880          |
| ANA (Brazil)         | '42930000'  | 'PORTO DO CAVALO '              | -17.031         | -45.539          |
| ANA (Brazil)         | '42980000'  | 'PORTO ALEGRE'                  | -16.907         | -45.383          |
| ANA (Brazil)         | '43200000'  | 'SÃO ROMÃO '                    | -16.373         | -45.070          |
| ANA (Brazil)         | '43429998'  | 'ARINOS - MONTANTE'             | -15.924         | -46.109          |
| ANA (Brazil)         | '43670000'  | 'VILA URUCUIA '                 | -16.133         | -45.742          |
| ANA (Brazil)         | '43880000'  | 'SANTO INÁCIO'                  | -16.281         | -45.414          |
| ANA (Brazil)         | '43980002'  | 'BARRA DO ESCURO '              | -16.268         | -45.237          |
| ANA (Brazil)         | '44200000'  | 'SÃO FRANCISCO'                 | -15.949         | -44.868          |
| ANA (Brazil)         | '44290002'  | 'PEDRAS DE MARIA DA<br>CRUZ'    | -15.610         | -44.395          |
| ANA (Brazil)         | '44500000'  | 'MANGA'                         | -14.757         | -43.932          |
| ANA (Brazil)         | '44670000'  | 'COLÔNIA DO JAIBA'              | -15.343         | -43.676          |
| ANA (Brazil)         | '44950000'  | 'BOCA DA CAATINGA'              | -14.783         | -43.538          |

| <b>Data Provider</b> | <b>Code</b> | <b>Name</b>               | <b>Latitude</b> | <b>Longitude</b> |
|----------------------|-------------|---------------------------|-----------------|------------------|
| ANA (Brazil)         | '45210000'  | 'LAGOA DAS PEDRAS'        | -14.283         | -44.409          |
| ANA (Brazil)         | '45260000'  | 'JUVENÍLIA '              | -14.260         | -44.152          |
| ANA (Brazil)         | '45298000'  | 'CARINHANHA'              | -14.304         | -43.763          |
| ANA (Brazil)         | '45480000'  | 'BOM JESUS DA LAPA'       | -13.257         | -43.435          |
| ANA (Brazil)         | '45910001'  | 'SANTA MARIA DA VITÓRIA ' | -13.397         | -44.199          |
| ANA (Brazil)         | '45960001'  | 'PORTO NOVO'              | -13.291         | -43.909          |
| ANA (Brazil)         | '46035000'  | 'GAMELEIRA'               | -12.869         | -43.380          |
| ANA (Brazil)         | '46105000'  | 'PARATINGA'               | -12.697         | -43.226          |
| ANA (Brazil)         | '46150000'  | 'IBOTIRAMA'               | -12.183         | -43.223          |
| ANA (Brazil)         | '46295000'  | 'PONTE BR-242'            | -12.245         | -42.764          |
| ANA (Brazil)         | '46360000'  | 'MORPARÁ '                | -11.558         | -43.283          |
| ANA (Brazil)         | '46550000'  | 'BARREIRAS'               | -12.153         | -45.009          |
| ANA (Brazil)         | '46610000'  | 'SÃO SEBASTIÃO'           | -11.979         | -44.877          |
| ANA (Brazil)         | '46650000'  | 'TAGUA'                   | -11.721         | -44.502          |
| ANA (Brazil)         | '46675000'  | 'FAZENDA MACAMBIRA'       | -11.611         | -44.157          |
| ANA (Brazil)         | '46790000'  | 'FORMOSA DO RIO PRETO '   | -11.051         | -45.197          |
| ANA (Brazil)         | '46830000'  | 'IBIPETUBA'               | -11.006         | -44.524          |
| ANA (Brazil)         | '46870000'  | 'FAZENDA PORTO LIMPO'     | -11.236         | -43.949          |
| ANA (Brazil)         | '46902000'  | 'BOQUEIRÃO'               | -11.355         | -43.846          |
| ANA (Brazil)         | '47900000'  | 'ABREUS'                  | -10.010         | -40.695          |
| ANA (Brazil)         | '48860000'  | 'FLORESTA'                | -8.609          | -38.577          |
| ANA (Brazil)         | '50169000'  | 'PONTE SE-302'            | -10.621         | -37.751          |
| ANA (Brazil)         | '50169500'  | 'CAMINHO DO RIO'          | -10.639         | -37.698          |
| ANA (Brazil)         | '50191000'  | 'FAZENDA BELÉM'           | -10.943         | -37.347          |
| ANA (Brazil)         | '50465000'  | 'QUEIMADAS'               | -10.973         | -39.633          |
| ANA (Brazil)         | '50494000'  | 'AMBRÓSIO'                | -10.998         | -39.224          |
| ANA (Brazil)         | '50520000'  | 'PONTE EUCLIDES DA CUNHA' | -11.060         | -38.837          |
| ANA (Brazil)         | '50540000'  | 'CIPÓ'                    | -11.098         | -38.513          |
| ANA (Brazil)         | '50591000'  | 'FAZENDA TRIANON'         | -11.664         | -37.936          |
| ANA (Brazil)         | '50595000'  | 'USINA ALTAMIRA'          | -11.735         | -37.803          |
| ANA (Brazil)         | '51240000'  | 'ITAETÉ '                 | -12.993         | -40.961          |
| ANA (Brazil)         | '51280000'  | 'IAÇU'                    | -12.762         | -40.214          |
| ANA (Brazil)         | '51330000'  | 'FAZENDA SANTA FÉ'        | -12.516         | -39.848          |
| ANA (Brazil)         | '51350000'  | 'ARGOIM '                 | -12.586         | -39.522          |
| ANA (Brazil)         | '51460000'  | 'PONTE RIO BRANCO'        | -12.233         | -39.046          |
| ANA (Brazil)         | '52264000'  | 'TOCADAS'                 | -14.109         | -41.429          |
| ANA (Brazil)         | '52265000'  | 'ROÇADOS'                 | -14.113         | -41.414          |
| ANA (Brazil)         | '52270000'  | 'SANTO ANTÔNIO '          | -14.096         | -41.292          |
| ANA (Brazil)         | '52404000'  | 'AREIÃO'                  | -14.031         | -40.983          |
| ANA (Brazil)         | '52405000'  | 'LAGOA DO TAMBURI'        | -13.878         | -40.896          |
| ANA (Brazil)         | '52570000'  | 'JEQUIÉ'                  | -13.864         | -40.081          |
| ANA (Brazil)         | '52680000'  | 'IPIAÚ'                   | -14.140         | -39.687          |

| <b>Data Provider</b> | <b>Code</b> | <b>Name</b>                          | <b>Latitude</b> | <b>Longitude</b> |
|----------------------|-------------|--------------------------------------|-----------------|------------------|
| ANA (Brazil)         | '52695000'  | 'VAPOR'                              | -14.209         | -39.546          |
| ANA (Brazil)         | '52831000'  | 'UBAITABA - JUSANTE'                 | -14.319         | -39.328          |
| ANA (Brazil)         | '53540001'  | 'VEREDA DO PARAÍSO<br>(SUDENE)'      | -15.494         | -41.450          |
| ANA (Brazil)         | '53620000'  | 'CÂNDIDO SALES'                      | -15.513         | -41.237          |
| ANA (Brazil)         | '53630000'  | 'INHOBIM'                            | -15.340         | -40.933          |
| ANA (Brazil)         | '53650000'  | 'ITAMBÉ '                            | -15.248         | -40.631          |
| ANA (Brazil)         | '53880000'  | 'FAZENDA NANCY'                      | -15.604         | -39.517          |
| ANA (Brazil)         | '53950000'  | 'MASCOTE'                            | -15.559         | -39.308          |
| ANA (Brazil)         | '54150000'  | 'PORTO MANDACARU'                    | -16.679         | -42.486          |
| ANA (Brazil)         | '54195000'  | 'BARRA DO SALINAS'                   | -16.618         | -42.309          |
| ANA (Brazil)         | '54390000'  | 'PEGA'                               | -16.860         | -42.348          |
| ANA (Brazil)         | '54500000'  | 'ARAÇUAÍ'                            | -16.850         | -42.063          |
| ANA (Brazil)         | '54530000'  | 'ITIRA'                              | -16.761         | -42.003          |
| ANA (Brazil)         | '54580000'  | 'ITAOBIM'                            | -16.568         | -41.503          |
| ANA (Brazil)         | '54710000'  | 'JEQUITINHONHA'                      | -16.428         | -41.014          |
| ANA (Brazil)         | '54780000'  | 'JACINTO'                            | -16.139         | -40.307          |
| ANA (Brazil)         | '54950000'  | 'ITAPEBI'                            | -15.948         | -39.524          |
| ANA (Brazil)         | '55699998'  | 'NANUQUE - MONTANTE'                 | -17.841         | -40.381          |
| ANA (Brazil)         | '55960000'  | 'BOCA DA VALA'                       | -18.651         | -40.089          |
| ANA (Brazil)         | '56425000'  | 'FAZENDA CACHOEIRA<br>D"ANTAS'       | -19.994         | -42.674          |
| ANA (Brazil)         | '56539000'  | 'CACHOEIRA DOS ÓCULOS<br>- MONTANTE' | -19.777         | -42.476          |
| ANA (Brazil)         | '56719998'  | 'CENIBRA'                            | -19.328         | -42.398          |
| ANA (Brazil)         | '56825000'  | 'NAQUE VELHO'                        | -19.188         | -42.423          |
| ANA (Brazil)         | '56850000'  | 'GOVERNADOR<br>VALADARES '           | -18.883         | -41.950          |
| ANA (Brazil)         | '56920000'  | 'TUMIRITINGA'                        | -18.971         | -41.639          |
| ANA (Brazil)         | '56948005'  | 'RESPLENDOR - JUSANTE'               | -19.343         | -41.246          |
| ANA (Brazil)         | '56994500'  | 'COLATINA'                           | -19.531         | -40.623          |
| ANA (Brazil)         | '58974000'  | 'CAMPOS - PONTE<br>MUNICIPAL'        | -21.753         | -41.300          |
| ANA (Brazil)         | '60040000'  | 'FAZENDA SÃO DOMINGOS'               | -18.103         | -47.695          |
| ANA (Brazil)         | '60510010'  | 'ENGENHEIRO AMORIM'                  | -17.036         | -47.941          |
| ANA (Brazil)         | '60544990'  | 'PIRES DO RIO - ME'                  | -17.328         | -48.239          |
| ANA (Brazil)         | '60545000'  | 'PIRES DO RIO '                      | -17.327         | -48.239          |
| ANA (Brazil)         | '60680000'  | 'PONTE MEIA PONTE'                   | -18.339         | -49.611          |
| ANA (Brazil)         | '60772000'  | 'FAZENDA SANTA MARIA'                | -17.981         | -50.247          |
| ANA (Brazil)         | '60798000'  | 'MAURILÂNDIA'                        | -17.974         | -50.337          |
| ANA (Brazil)         | '60805000'  | 'PONTE SUL GOIANA'                   | -18.071         | -50.172          |
| ANA (Brazil)         | '60907000'  | 'FAZENDA RONDINHA'                   | -19.083         | -50.648          |
| ANA (Brazil)         | '61145000'  | 'MACAIA '                            | -21.145         | -44.914          |
| ANA (Brazil)         | '61855000'  | 'FAZENDA BELA VISTA '                | -20.909         | -48.089          |
| ANA (Brazil)         | '61902000'  | 'PORTO FERREIRA'                     | -21.842         | -47.475          |

| <b>Data Provider</b> | <b>Code</b> | <b>Name</b>                           | <b>Latitude</b> | <b>Longitude</b> |
|----------------------|-------------|---------------------------------------|-----------------|------------------|
| ANA (Brazil)         | '61912000'  | 'PONTE GUATAPARA'                     | -21.502         | -48.041          |
| ANA (Brazil)         | '61915000'  | 'PASSAGEM'                            | -21.017         | -48.177          |
| ANA (Brazil)         | '61915005'  | 'PASSAGEM'                            | -21.019         | -48.181          |
| ANA (Brazil)         | '61925000'  | 'PONTE JOAQUIM JUSTINO'               | -20.454         | -48.450          |
| ANA (Brazil)         | '63002000'  | 'SÃO JOSÉ DO SUCURIU'                 | -19.965         | -52.219          |
| ANA (Brazil)         | '63003100'  | 'PORTO GALEANO'                       | -20.094         | -52.160          |
| ANA (Brazil)         | '63350100'  | 'ÁGUA CLARA'                          | -20.444         | -52.899          |
| ANA (Brazil)         | '63390000'  | 'ESTRADA QUEIROZ'                     | -20.889         | -52.355          |
| ANA (Brazil)         | '63950280'  | 'FAZENDA BARRA GRANDE'                | -21.574         | -53.618          |
| ANA (Brazil)         | '63955000'  | 'DELFINO COSTA'                       | -21.614         | -53.051          |
| ANA (Brazil)         | '63970000'  | 'FAZENDA BURITI'                      | -21.662         | -52.866          |
| ANA (Brazil)         | '64390000'  | 'PORTO SANTA TEREZINHA'               | -23.123         | -50.450          |
| ANA (Brazil)         | '64482000'  | 'TELÊMACO BORBA'                      | -24.359         | -50.595          |
| ANA (Brazil)         | '64501000'  | 'PORTO LONDRINA'                      | -23.650         | -50.883          |
| ANA (Brazil)         | '64506000'  | 'CHACARA ANA CLAÚDIA'                 | -23.283         | -50.967          |
| ANA (Brazil)         | '64507000'  | 'JATAIZINHO ANA/CESP'                 | -23.251         | -50.982          |
| ANA (Brazil)         | '64611000'  | 'RETIRO GUARUJÁ'                      | -21.901         | -54.054          |
| ANA (Brazil)         | '64614000'  | 'FAZENDA IPACARAI'                    | -21.956         | -53.768          |
| ANA (Brazil)         | '64617000'  | 'IVINHEMA '                           | -22.383         | -53.529          |
| ANA (Brazil)         | '64655000'  | 'UBÁ DO SUL'                          | -24.042         | -51.623          |
| ANA (Brazil)         | '64689005'  | 'TAPIRA JUSANTE'                      | -23.231         | -53.052          |
| ANA (Brazil)         | '64693000'  | 'NOVO PORTO TAQUARA'                  | -23.198         | -53.304          |
| ANA (Brazil)         | '64795000'  | 'PONTE DO PIQUIRI'                    | -24.517         | -53.167          |
| ANA (Brazil)         | '64820000'  | 'PORTO FORMOSA'                       | -24.200         | -53.333          |
| ANA (Brazil)         | '64830000'  | 'BALSA SANTA MARIA '                  | -24.166         | -53.736          |
| ANA (Brazil)         | '65220000'  | 'FLUVIÓPOLIS'                         | -26.019         | -50.593          |
| ANA (Brazil)         | '65310000'  | 'UNIÃO DA VITÓRIA '                   | -26.228         | -51.080          |
| ANA (Brazil)         | '66015000'  | 'PORTO ESTRELA'                       | -15.326         | -57.226          |
| ANA (Brazil)         | '66070004'  | 'CÁCERES (DNPVN) '                    | -16.063         | -57.688          |
| ANA (Brazil)         | '66090000'  | 'DESCALVADOS'                         | -16.733         | -57.748          |
| ANA (Brazil)         | '66120000'  | 'PORTO CONCEIÇÃO'                     | -17.143         | -57.359          |
| ANA (Brazil)         | '66250001'  | 'ROSÁRIO OESTE '                      | -14.834         | -56.414          |
| ANA (Brazil)         | '66255000'  | 'ACORIZAL'                            | -15.204         | -56.367          |
| ANA (Brazil)         | '66260001'  | 'CUIABÁ '                             | -15.616         | -56.109          |
| ANA (Brazil)         | '66280000'  | 'BARÃO DE MELGAÇO'                    | -16.192         | -55.966          |
| ANA (Brazil)         | '66340000'  | 'PORTO CERCADO (EX-Retiro Biguacal) ' | -16.500         | -56.333          |
| ANA (Brazil)         | '66360000'  | 'SÃO JOÃO'                            | -16.944         | -56.632          |
| ANA (Brazil)         | '66370000'  | 'ILHA CAMARGO'                        | -17.057         | -56.586          |
| ANA (Brazil)         | '66450001'  | 'RONDONÓPOLIS'                        | -16.479         | -54.651          |
| ANA (Brazil)         | '66460000'  | 'ACIMA DO CÓRREGO GRANDE'             | -16.608         | -55.206          |
| ANA (Brazil)         | '66470000'  | 'SÃO JOSÉ DO BORIRÉU'                 | -16.921         | -56.223          |

| <b>Data Provider</b> | <b>Code</b>  | <b>Name</b>                           | <b>Latitude</b> | <b>Longitude</b> |
|----------------------|--------------|---------------------------------------|-----------------|------------------|
| ANA (Brazil)         | '66600000'   | 'SÃO JERÔNIMO '                       | -17.201         | -56.008          |
| ANA (Brazil)         | '66650000'   | 'SÃO JOSÉ DO PIQUIRI'                 | -17.291         | -56.385          |
| ANA (Brazil)         | '66710000'   | 'POUSADA TAIAMÃ (Ex-<br>Porto Jofre)' | -17.368         | -56.773          |
| ANA (Brazil)         | '66750000'   | 'PORTO ALEGRE'                        | -17.623         | -56.965          |
| ANA (Brazil)         | '66800000'   | 'AMOLAR'                              | -18.039         | -57.489          |
| ANA (Brazil)         | '66810000'   | 'SÃO FRANCISCO '                      | -18.394         | -57.391          |
| ANA (Brazil)         | '66870000'   | 'COXIM '                              | -18.508         | -54.761          |
| ANA (Brazil)         | '66895000'   | 'PORTO DA MANGA'                      | -19.258         | -57.235          |
| ANA (Brazil)         | '66910000'   | 'MIRANDA'                             | -20.241         | -56.396          |
| ANA (Brazil)         | '66941000'   | 'PALMEIRAS (JANGO)'                   | -20.448         | -55.428          |
| ANA (Brazil)         | '66945000'   | 'AQUIDAUANA '                         | -20.459         | -55.781          |
| ANA (Brazil)         | '66950000'   | 'PORTO CIRIACO'                       | -19.697         | -56.281          |
| ANA (Brazil)         | '67100000'   | 'PORTO MURTINHO'                      | -21.700         | -57.891          |
| ANA (Brazil)         | '67170000'   | 'SÃO CARLOS'                          | -22.224         | -57.304          |
| ANA (Brazil)         | '71550000'   | 'PASSO CARU'                          | -27.538         | -50.860          |
| ANA (Brazil)         | '72300000'   | 'PASSO DO VIRGILIO'                   | -27.501         | -51.714          |
| ANA (Brazil)         | '73010000'   | 'MARCELINO RAMOS '                    | -27.461         | -51.904          |
| ANA (Brazil)         | '73550000'   | 'PASSO CAXAMBU'                       | -27.171         | -52.868          |
| ANA (Brazil)         | '74100000'   | 'IRAÍ'                                | -27.190         | -53.265          |
| ANA (Brazil)         | '74800000'   | 'PORTO LUCENA '                       | -27.854         | -55.023          |
| ANA (Brazil)         | '75550000'   | 'GARRUCHOS'                           | -28.183         | -55.643          |
| ANA (Brazil)         | '75780000'   | 'PASSO SÃO BORJA '                    | -28.630         | -56.039          |
| ANA (Brazil)         | '76310000'   | 'ROSÁRIO DO SUL '                     | -30.243         | -54.916          |
| ANA (Brazil)         | '76500000'   | 'JACAQUA'                             | -29.686         | -55.194          |
| ANA (Brazil)         | '76560000'   | 'MANOEL VIANA '                       | -29.596         | -55.481          |
| ANA (Brazil)         | '76800000'   | 'PASSO MARIANO PINTO '                | -29.308         | -56.055          |
| ANA (Brazil)         | '77150000'   | 'URUGUAIANA '                         | -29.748         | -57.089          |
| ANA (Brazil)         | '81350000'   | 'IPORANGA'                            | -24.585         | -48.591          |
| ANA (Brazil)         | '83800002'   | 'BLUMENAU'                            | -26.918         | -49.065          |
| ANA (Brazil)         | '85642000'   | 'PASSO SÃO LOURENÇO'                  | -30.009         | -53.016          |
| ANA (Brazil)         | '85900000'   | 'RIO PARDO'                           | -29.996         | -52.374          |
| ANA (Brazil)         | '86460000'   | 'MONTE CLARO'                         | -29.033         | -51.517          |
| ANA (Brazil)         | '86470000'   | 'PONTE DO RIO DAS<br>ANTAS'           | -29.045         | -51.567          |
| ANA (Brazil)         | '86510000'   | 'MUÇUM'                               | -29.166         | -51.868          |
| ANA (Brazil)         | '86720000'   | 'ENCANTADO'                           | -29.234         | -51.854          |
| ANA (Brazil)         | '87905000'   | 'PASSO DO MENDONÇA'                   | -31.010         | -52.053          |
| DGA (Chile)          | '09140001-4' | 'ALMAGRO'                             | -38.785         | -72.952          |
| DGA (Chile)          | '10122001-K' | 'BALSA SAN JAVIER'                    | -39.778         | -72.990          |
| DGA (Chile)          | '05748001-7' | 'CABIMBAO'                            | -33.724         | -71.557          |
| DGA (Chile)          | '03450001-0' | 'CIUDAD COPIAPO'                      | -27.369         | -70.341          |
| DGA (Chile)          | '08141001-1' | 'COELEMU'                             | -36.467         | -72.694          |
| DGA (Chile)          | '08334001-0' | 'COIHUE'                              | -37.550         | -72.593          |



| <b>Data Provider</b>             | <b>Code</b>  | <b>Name</b>         | <b>Latitude</b> | <b>Longitude</b> |
|----------------------------------|--------------|---------------------|-----------------|------------------|
| DGA (Chile)                      | '07383001-K' | 'FOREL'             | -35.410         | -72.212          |
| DGA (Chile)                      | '07359001-9' | 'LAS BRISAS'        | -35.617         | -71.768          |
| DGA (Chile)                      | '04558001-6' | 'PANAMERICANA'      | -30.667         | -71.533          |
| DGA (Chile)                      | '09437002-7' | 'THEODORO SCHMIDT'  | -39.020         | -73.089          |
| GRDC (Global Runoff Data Centre) | '330830'     | 'APAIKWA'           | 6.380           | -60.380          |
| GRDC (Global Runoff Data Centre) | '384410'     | 'D J SADE'          | 0.523           | -79.415          |
| GRDC (Global Runoff Data Centre) | '384440'     | 'LA CAPILLA'        | -1.696          | -79.996          |
| IDEAM (Colombia)                 | '11057010'   | 'TAGACHI'           | 6.217           | -76.717          |
| IDEAM (Colombia)                 | '11057020'   | 'SAN ANTONIO PADUA' | 6.283           | -76.767          |
| IDEAM (Colombia)                 | '21237010'   | 'NARIÑO AUTOM'      | 4.383           | -74.850          |
| IDEAM (Colombia)                 | '21237020'   | 'ARRANCAPLUMAS'     | 5.183           | -74.717          |
| IDEAM (Colombia)                 | '23037010'   | 'PTO SALGAR AUTOM'  | 5.467           | -74.667          |
| IDEAM (Colombia)                 | '23157080'   | 'MALDONADO'         | 7.200           | -73.933          |
| IDEAM (Colombia)                 | '23167010'   | 'PENAS BLANCAS'     | 6.950           | -73.950          |
| IDEAM (Colombia)                 | '23187280'   | 'SITIO NUEVO'       | 7.833           | -73.800          |
| IDEAM (Colombia)                 | '25027050'   | 'MARGENTO'          | 8.033           | -74.950          |
| IDEAM (Colombia)                 | '25027270'   | 'LAS FLORES'        | 8.117           | -74.783          |
| IDEAM (Colombia)                 | '25027330'   | 'PENONCITO'         | 8.983           | -73.950          |
| IDEAM (Colombia)                 | '25027640'   | 'TRES CRUCES'       | 8.700           | -74.517          |
| IDEAM (Colombia)                 | '25027940'   | 'TACAMOCHO'         | 9.483           | -74.800          |
| IDEAM (Colombia)                 | '26167070'   | 'IRRA'              | 5.267           | -75.683          |
| IDEAM (Colombia)                 | '26187110'   | 'LA PINTADA AUTOM'  | 5.733           | -75.600          |
| IDEAM (Colombia)                 | '26207030'   | 'PTE IGLESIAS'      | 5.817           | -75.700          |
| IDEAM (Colombia)                 | '26237050'   | 'PTE PESCADERO'     | 7.083           | -75.700          |
| IDEAM (Colombia)                 | '26237100'   | 'OLAYA'             | 6.650           | -75.817          |
| IDEAM (Colombia)                 | '26247030'   | 'APAVI'             | 7.483           | -75.333          |
| IDEAM (Colombia)                 | '29037020'   | 'CALAMAR'           | 10.250          | -74.917          |
| IDEAM (Colombia)                 | '31097010'   | 'GUAYARE'           | 3.967           | -67.817          |
| IDEAM (Colombia)                 | '32097010'   | 'MAPIRIPAN'         | 2.867           | -72.167          |
| IDEAM (Colombia)                 | '32107010'   | 'PTO ARTURO'        | 2.583           | -72.700          |
| IDEAM (Colombia)                 | '37057040'   | 'ANGELITOS LOS'     | 7.000           | -71.100          |
| IDEAM (Colombia)                 | '37057060'   | 'PTE INTERNACIONAL' | 7.083           | -70.767          |
| IDEAM (Colombia)                 | '38017030'   | 'RONCADOR'          | 5.883           | -67.567          |
| IDEAM (Colombia)                 | '44137020'   | 'GUAQUIRA'          | -0.333          | -74.033          |
| IDEAM (Colombia)                 | '44137080'   | 'PTO LAS BRISAS'    | -0.583          | -72.467          |
| IDEAM (Colombia)                 | '44157010'   | 'MERCEDES LAS'      | -0.533          | -72.167          |
| IDEAM (Colombia)                 | '44157030'   | 'MARIA MANTECA'     | -1.400          | -70.600          |
| IDEAM (Colombia)                 | '44167020'   | 'STA ISABEL'        | -1.133          | -71.100          |
| IDEAM (Colombia)                 | '44187010'   | 'PTO CORDOBA'       | -1.267          | -69.733          |
| IDEAM (Colombia)                 | '44187030'   | 'BACURI'            | -1.234          | -69.470          |
| IDEAM (Colombia)                 | '44197020'   | 'VILLAREAL'         | -1.300          | -69.617          |

| <b>Data Provider</b> | <b>Code</b> | <b>Name</b>                           | <b>Latitude</b> | <b>Longitude</b> |
|----------------------|-------------|---------------------------------------|-----------------|------------------|
| INA (Argentina)      | '1453'      | 'CARMENSA'                            | -35.185         | -67.726          |
| INA (Argentina)      | '0693'      | 'POZO SARMIENTO'                      | -23.217         | -64.200          |
| INA (Argentina)      | '2602'      | 'EL COLORADO'                         | -26.334         | -59.362          |
| INA (Argentina)      | '3223'      | 'PUEBLO ANDINO'                       | -32.673         | -60.866          |
| INA (Argentina)      | '2207'      | 'LOS ALTARES'                         | -43.889         | -68.398          |
| INA (Argentina)      | '3249'      | 'RUTA NACIONAL N° 168'                | -31.661         | -60.602          |
| INA (Argentina)      | '1801'      | 'PICI MAHUIDA'                        | -38.821         | -64.981          |
| INA (Argentina)      | '3803'      | 'PASO LUCERO'                         | -28.994         | -58.561          |
| INA (Argentina)      | '3821'      | 'LOS LAURALES'                        | -29.757         | -59.217          |
| INA (Argentina)      | '1219'      | 'EL ENCON'                            | -32.225         | -67.807          |
| INA (Argentina)      | '1452'      | 'CANALEJAS'                           | -35.169         | -66.495          |
| INA (Argentina)      | '2824'      | 'RUTA PROVINCIAL N° 039'              | -46.724         | -69.593          |
| INA (Argentina)      | '3265'      | 'AUTOPISTA'                           | -32.393         | -60.941          |
| INA (Argentina)      | '3004'      | 'ROSARIO DEL TALA'                    | -32.308         | -59.077          |
| INA (Argentina)      | '2211'      | 'GUALJAINA'                           | -42.654         | -70.439          |
| INA (Argentina)      | '0686'      | 'FINCA AGROPECUARIA'                  | -25.162         | -64.105          |
| INA (Argentina)      | '0695'      | 'EL QUEBRACHAL'                       | -25.344         | -64.046          |
| INA (Argentina)      | '3231'      | 'RUTA PROVINCIAL N° 32'               | -28.491         | -59.388          |
| INA (Argentina)      | '3804'      | 'PASO LEDESMA'                        | -29.846         | -57.675          |
| INA (Argentina)      | '2004'      | 'PASO DE INDIOS'                      | -38.532         | -69.413          |
| INA (Argentina)      | '2401'      | 'PUERTO BERMEJO'                      | -26.926         | -58.507          |
| INA (Argentina)      | '2606'      | 'PUERTO PILCOMAYO'                    | -25.420         | -57.651          |
| INA (Argentina)      | '0631'      | 'LA PAZ'                              | -22.378         | -62.523          |
| INA (Argentina)      | '0804'      | 'SUNCHO CORRAL'                       | -27.950         | -63.433          |
| INA (Argentina)      | '0810'      | 'CANAL DE DIOS'                       | -25.630         | -63.949          |
| INA (Argentina)      | '0811'      | 'RUTA PROVINCIAL N° 092 -<br>AÑATUYA' | -28.503         | -62.881          |
| INA (Argentina)      | '3126'      | 'RUTA PROVINCIAL N° 070'              | -31.491         | -60.781          |
| INA (Argentina)      | '0470'      | 'RUTA PROVINCIAL N° 323'              | -27.133         | -65.316          |
| INA (Argentina)      | '0016'      | 'CAIMANCITO'                          | -23.733         | -64.467          |
| INA (Argentina)      | '0471'      | 'RUTA PROVINCIAL N° 157'              | -27.336         | -65.317          |
| INA (Argentina)      | '2297'      | 'LOS MOLINOS'                         | -45.991         | -69.500          |
| INA (Argentina)      | '3339'      | 'SANTA FE - LA GUARDIA'               | -31.630         | -60.678          |
| INA (Argentina)      | '3340'      | 'FLORENCIA'                           | -28.029         | -59.225          |
| INA (Argentina)      | '0637'      | 'SAN TELMO'                           | -22.571         | -64.240          |
| ONS (Brazil)         | -           | 'A. VERMELHA'                         | -19.863         | -50.346          |
| ONS (Brazil)         | -           | 'A.A. LAYDNER'                        | -23.210         | -49.230          |
| ONS (Brazil)         | -           | 'A.S. LIMA'                           | -22.153         | -48.753          |
| ONS (Brazil)         | -           | 'AIMORÉS'                             | -19.498         | -41.024          |
| ONS (Brazil)         | -           | 'B. COQUEIROS'                        | -18.722         | -51.003          |
| ONS (Brazil)         | -           | 'B. ESPERANCA'                        | -6.754          | -43.563          |
| ONS (Brazil)         | -           | 'BAGUARI'                             | -19.022         | -42.125          |
| ONS (Brazil)         | -           | 'BARRA BONITA'                        | -22.519         | -48.534          |
| ONS (Brazil)         | -           | 'BARRA GRANDE'                        | -27.780         | -51.192          |

| <b>Data Provider</b> | <b>Code</b> | <b>Name</b>              | <b>Latitude</b> | <b>Longitude</b> |
|----------------------|-------------|--------------------------|-----------------|------------------|
| ONS (Brazil)         | -           | 'CACHOEIRA DOURADA'      | -18.504         | -49.490          |
| ONS (Brazil)         | -           | 'CACU'                   | -18.532         | -51.149          |
| ONS (Brazil)         | -           | 'CAMPOS NOVOS'           | -27.604         | -51.327          |
| ONS (Brazil)         | -           | 'CANA BRAVA'             | -13.402         | -48.143          |
| ONS (Brazil)         | -           | 'CANOAS I'               | -22.941         | -50.517          |
| ONS (Brazil)         | -           | 'CANOAS II'              | -22.938         | -50.251          |
| ONS (Brazil)         | -           | 'CAPIM BRANCO I'         | -18.789         | -48.149          |
| ONS (Brazil)         | -           | 'CAPIM BRANCO II'        | -18.659         | -48.437          |
| ONS (Brazil)         | -           | 'CAPIVARA '              | -22.655         | -51.357          |
| ONS (Brazil)         | -           | 'CHAVANTES'              | -23.128         | -49.733          |
| ONS (Brazil)         | -           | 'COARACY NUNES'          | 0.903           | -51.259          |
| ONS (Brazil)         | -           | 'COMP PAF'               | -9.396          | -38.202          |
| ONS (Brazil)         | -           | 'CORUMBÁ I'              | -17.988         | -48.532          |
| ONS (Brazil)         | -           | 'CORUMBÁ III'            | -16.788         | -47.935          |
| ONS (Brazil)         | -           | 'CURUÁ-UNA'              | -2.812          | -54.299          |
| ONS (Brazil)         | -           | 'D. FRANCISCA'           | -29.449         | -53.285          |
| ONS (Brazil)         | -           | 'DARDANELOS'             | -10.159         | -59.453          |
| ONS (Brazil)         | -           | 'EMBORCAÇÃO'             | -18.452         | -47.985          |
| ONS (Brazil)         | -           | 'ESTREITO'               | -20.151         | -47.280          |
| ONS (Brazil)         | -           | 'ESTREITO TOCANTINS'     | -6.589          | -47.466          |
| ONS (Brazil)         | -           | 'FOZ CHAPECÓ'            | -27.139         | -53.044          |
| ONS (Brazil)         | -           | 'FOZ DO AREIA'           | -26.010         | -51.666          |
| ONS (Brazil)         | -           | 'FOZ DO RIO CLARO'       | -19.117         | -50.646          |
| ONS (Brazil)         | -           | 'FUNIL (Paraíba do Sul)' | -22.529         | -44.568          |
| ONS (Brazil)         | -           | 'FUNIL (Grande)'         | -21.143         | -45.036          |
| ONS (Brazil)         | -           | 'FURNAS'                 | -20.669         | -46.318          |
| ONS (Brazil)         | -           | 'GARIBALDI'              | -27.626         | -50.985          |
| ONS (Brazil)         | -           | 'IBITINGA'               | -21.759         | -48.991          |
| ONS (Brazil)         | -           | 'IGARAPAVA'              | -19.989         | -47.756          |
| ONS (Brazil)         | -           | 'ILHA DOS POMBOS'        | -21.852         | -42.608          |
| ONS (Brazil)         | -           | 'IRAPÉ'                  | -16.738         | -42.575          |
| ONS (Brazil)         | -           | 'ITÁ'                    | -27.277         | -52.382          |
| ONS (Brazil)         | -           | 'ITAIPU '                | -25.408         | -54.587          |
| ONS (Brazil)         | -           | 'ITAPARICA'              | -9.144          | -38.312          |
| ONS (Brazil)         | -           | 'ITAPEBI'                | -15.966         | -39.593          |
| ONS (Brazil)         | -           | 'ITAÚBA'                 | -29.261         | -53.236          |
| ONS (Brazil)         | -           | 'ITUMBIARA'              | -18.407         | -49.099          |
| ONS (Brazil)         | -           | 'JAGUARA'                | -20.023         | -47.434          |
| ONS (Brazil)         | -           | 'JUPIÁ '                 | -20.776         | -51.627          |
| ONS (Brazil)         | -           | 'LAJEADO'                | -9.757          | -48.372          |
| ONS (Brazil)         | -           | 'M. DE MORAES'           | -20.286         | -47.064          |
| ONS (Brazil)         | -           | 'MACHADINHO'             | -27.527         | -51.790          |
| ONS (Brazil)         | -           | 'MARIMBONDO'             | -20.303         | -49.198          |

| <b>Data Provider</b> | <b>Code</b> | <b>Name</b>             | <b>Latitude</b> | <b>Longitude</b> |
|----------------------|-------------|-------------------------|-----------------|------------------|
| ONS (Brazil)         | -           | 'MASCARENHAS'           | -19.500         | -40.918          |
| ONS (Brazil)         | -           | 'MAUA'                  | -24.062         | -50.706          |
| ONS (Brazil)         | -           | 'MIRANDA'               | -18.910         | -48.041          |
| ONS (Brazil)         | -           | 'MONTE CLARO'           | -29.031         | -51.521          |
| ONS (Brazil)         | -           | 'MOXOTO'                | -9.358          | -38.208          |
| ONS (Brazil)         | -           | 'NOVA AVANHANDAVA '     | -21.119         | -50.201          |
| ONS (Brazil)         | -           | 'NOVA PONTE'            | -19.133         | -47.697          |
| ONS (Brazil)         | -           | 'OURINHOS'              | -23.068         | -49.838          |
| ONS (Brazil)         | -           | 'P. AFONSO'             | -9.416          | -38.208          |
| ONS (Brazil)         | -           | 'P. CAVALO'             | -12.584         | -38.998          |
| ONS (Brazil)         | -           | 'P. COLOMBIA'           | -20.124         | -48.572          |
| ONS (Brazil)         | -           | 'P. PRIMAVERA'          | -22.476         | -52.959          |
| ONS (Brazil)         | -           | 'PASSO SÃO JOÃO'        | -28.142         | -55.052          |
| ONS (Brazil)         | -           | 'PEIXE ANGICAL'         | -12.235         | -48.386          |
| ONS (Brazil)         | -           | 'PIRAJÚ'                | -23.154         | -49.380          |
| ONS (Brazil)         | -           | 'PROMISSÃO'             | -21.296         | -49.783          |
| ONS (Brazil)         | -           | 'RETIRO BAIXO'          | -18.878         | -44.781          |
| ONS (Brazil)         | -           | 'ROSANA'                | -22.600         | -52.869          |
| ONS (Brazil)         | -           | 'SALTO'                 | -18.808         | -51.171          |
| ONS (Brazil)         | -           | 'SALTO CAXIAS'          | -25.543         | -53.498          |
| ONS (Brazil)         | -           | 'SALTO OSÓRIO'          | -25.538         | -53.009          |
| ONS (Brazil)         | -           | 'SAMUEL'                | -8.751          | -63.454          |
| ONS (Brazil)         | -           | 'SANTO ANTÔNIO'         | -8.797          | -63.952          |
| ONS (Brazil)         | -           | 'SÃO SALVADOR'          | -12.808         | -48.238          |
| ONS (Brazil)         | -           | 'SÃO SIMÃO'             | -19.018         | -50.499          |
| ONS (Brazil)         | -           | 'SEGREDO'               | -25.790         | -52.112          |
| ONS (Brazil)         | -           | 'SERRA DA MESA'         | -13.834         | -48.305          |
| ONS (Brazil)         | -           | 'SERRA FACÃO'           | -18.046         | -47.675          |
| ONS (Brazil)         | -           | 'SLT. SANTIAGO'         | -25.629         | -52.615          |
| ONS (Brazil)         | -           | 'SLT. VERDINHO'         | -19.143         | -50.754          |
| ONS (Brazil)         | -           | 'SOBRADINHO'            | -9.430          | -40.827          |
| ONS (Brazil)         | -           | 'STA CECILIA'           | -22.481         | -43.839          |
| ONS (Brazil)         | -           | 'STA CLARA'             | -17.896         | -40.202          |
| ONS (Brazil)         | -           | 'STO ANT JARI'          | -0.641          | -52.507          |
| ONS (Brazil)         | -           | 'TAQUARUÇU'             | -22.544         | -52.000          |
| ONS (Brazil)         | -           | 'TELES PIRES'           | -9.349          | -56.779          |
| ONS (Brazil)         | -           | 'TRÊS IRMÃOS'           | -20.669         | -51.300          |
| ONS (Brazil)         | -           | 'TRÊS MARIAS'           | -18.215         | -45.259          |
| ONS (Brazil)         | -           | 'TUCURUÍ'               | -3.832          | -49.643          |
| ONS (Brazil)         | -           | 'VOLTA GRANDE'          | -20.033         | -48.222          |
| ONS (Brazil)         | -           | 'XINGÓ'                 | -9.620          | -37.793          |
| ORE-HyBam            | '10064000'  | 'BORJA'                 | -4.470          | -77.548          |
| ORE-HyBam            | '10080900'  | 'FRANCISCO DE ORELLANA' | -0.473          | -76.983          |

| <b>Data Provider</b> | <b>Code</b> | <b>Name</b>          | <b>Latitude</b> | <b>Longitude</b> |
|----------------------|-------------|----------------------|-----------------|------------------|
| ORE-HyBam            | '10099800'  | 'NAZARETH'           | -4.121          | -70.036          |
| ORE-HyBam            | '10100000'  | 'TABATINGA'          | -4.250          | -69.933          |
| ORE-HyBam            | '13870000'  | 'LABREA'             | -7.252          | -64.800          |
| ORE-HyBam            | '14100000'  | 'MANACAPURU'         | -3.308          | -60.609          |
| ORE-HyBam            | '14710000'  | 'CARACARA'           | 1.821           | -61.124          |
| ORE-HyBam            | '14840000'  | 'MOURA'              | -1.456          | -61.633          |
| ORE-HyBam            | '15275100'  | 'RURRENABAQUE'       | -14.445         | -67.534          |
| ORE-HyBam            | '15400000'  | 'PORTO VELHO'        | -8.737          | -63.920          |
| ORE-HyBam            | '15860000'  | 'BORBA'              | -4.897          | -60.025          |
| ORE-HyBam            | '17050001'  | 'OBIDOS'             | -1.947          | -55.511          |
| ORE-HyBam            | '17730000'  | 'ITAITUBA'           | -4.283          | -55.983          |
| ORE-HyBam            | '30030000'  | 'LANGA TABIKI'       | 4.986           | -54.437          |
| ORE-HyBam            | '30055000'  | 'SAUT MARIPA'        | 3.802           | -51.885          |
| ORE-HyBam            | '40800000'  | 'CIUDAD BOLIVAR'     | 8.143           | -63.607          |
| SENAMHI/Peru         | '10043000'  | 'PICOTA'             | -6.955          | -76.369          |
| SENAMHI/Peru         | '10043600'  | 'CHAZUTA'            | -6.578          | -76.129          |
| SENAMHI/Peru         | '10046000'  | 'PUCALLPA'           | -8.382          | -74.522          |
| SENAMHI/Peru         | '10070500'  | 'SAN REGIS'          | -4.507          | -73.920          |
| SENAMHI/Peru         | '10074800'  | 'REQUENA'            | -5.010          | -73.820          |
| SENAMHI/Peru         | '10075000'  | 'TAMSHIYACU'         | -4.003          | -73.161          |
| SENAMHI/Peru         | '10082800'  | 'NUEVO ROCAFUERTE'   | -0.916          | -75.396          |
| SENAMHI/Peru         | '10086800'  | 'BELLAVISTA'         | -3.487          | -73.084          |
| SENAMHI/Bolivia      | '15230200'  | 'PUERTO VILLAROEL'   | -16.836         | -64.799          |
| SENAMHI/Bolivia      | '15233000'  | 'CAMIACO'            | -15.334         | -64.866          |
| SENAMHI/Bolivia      | '15242000'  | 'PUERTO SILES'       | -12.804         | -65.003          |
| SENAMHI/Bolivia      | '15250010'  | 'GUAYARAMERIN'       | -10.812         | -65.343          |
| SENAMHI/Bolivia      | '15289800'  | 'MIRAFLORES'         | -11.108         | -66.411          |
| SENAMHI/Bolivia      | '15290000'  | 'PENAS AMARILLAS'    | -11.550         | -66.667          |
| SENAMHI/Bolivia      | '15292000'  | 'RIBERALTA'          | -11.000         | -66.078          |
| SENAMHI/Bolivia      | '15295500'  | 'CACHUELA ESPERANZA' | -10.538         | -65.572          |
| SENAMHI/Bolivia      | '15312000'  | 'EL SENA'            | -11.470         | -67.237          |

## Additional References

Almeida, G. A. M., Bates, P., Freer, J. E., and Souvignet, M.: Improving the stability of a simple formulation of the shallow water equations for 2-D flood modeling, *Water Resources Research*, 48, 10.1029/2011WR011570, 2012.

Almeida, G. A. M., and Bates, P.: Applicability of the local inertial approximation of the shallow water equations to flood modeling, *Water Resources Research*, 49, 4833-4844, 10.1002/wrcr.20366, 2013.

Butt, M. A., and Maragos, P.: Optimum design of Chamfer distance transforms, *IEEE Transactions on Image Processing*, 7, 1477-1484, 10.1109/83.718487, 1998.

Beven, K.: *Rainfall-Runoff Modelling: The Primer*. Wiley, 448p, 2001

Chen, H., Liang, Q., Liu, Y., and Xie, S.: Hydraulic correction method (HCM) to enhance the efficiency of SRTM DEM in flood modeling, *Journal of Hydrology*, 559, 56-70, 10.1016/j.jhydrol.2018.01.056, 2018.

Cunge, J. A., Holly, F. M., and Verwey, A.: *Practical aspects of computational river hydraulics*. Pitman, 1980

Jenson, S. K., and Domingue, J. O.: Extracting topographic structure from digital elevation data for geographic information system analysis, *Photogrammetric Engineering and Remote Sensing*, 54, 1593-1600, 1988.

Maidment, D. R.: *Arc Hydro: GIS for water resources*. ESRI, 203p, 2002

Neal, J., Schumann, G., and Bates, P.: A subgrid channel model for simulating river hydraulics and floodplain inundation over large and data sparse areas, *Water Resources Research*, 48, 10.1029/2012WR012514, 2012.

Paz, A. R., and Collischonn, W.: River reach length and slope estimates for large-scale hydrological models based on a relatively high-resolution digital elevation model, *Journal of Hydrology*, 343, 127-139, 10.1016/j.jhydrol.2007.06.006, 2007.

Rawls, W. J., Ahuja, L. R., Brakensiek, D. and Shirmohammadi, A.: Infiltration and soil water movement, in: *Handbook of Hydrology*, edited by Maidment, D. R. McGraw-Hill, 1424p, 1993.

Shuttleworth, W. J.: Evaporation, in: *Handbook of Hydrology*, edited by: Maidment, D. R., McGraw-Hill, 1424p, 1993.

Wigmosta, M. S., Vail, L. W. and Lettenmaier, D. P.: A distributed hydrology-vegetation model for complex terrain. *Water Resources Research*, 30(6), 1665-1679, 1994.

Yamazaki, D., Baugh, C. A., Bates, P. D., Kanae, S., Alsdorf, D. E., and Oki, T.: Adjustment of a spaceborne DEM for use in floodplain hydrodynamic modeling, *Journal of Hydrology*, 436-437, 81-91, 10.1016/j.jhydrol.2012.02.045, 2012.
